# Supplementary material for: Designing Antitrypanosomal and Antileishmanial BODIPY Derivatives: A Computational and In Vitro Assessment
Source: MDPI journal article supplement (doi:10.3390/molecules29092072), 2024-04-30
Supplement: s1 [file s1]

# Supporting Information

## Designing Antitrypanosomal and Antileishmanial BODIPY Derivatives: A Computational and in vitro Assessment

Raquel C. R. Gonçalves<sup>1,2\*</sup>, Filipe Teixeira<sup>1\*</sup>, Pablo Peñalver<sup>3</sup>, Susana P. G. Costa<sup>1</sup>, Juan C. Morales<sup>3</sup>, M. Manuela M. Raposo<sup>1\*\*</sup>

<sup>1</sup>Centre of Chemistry, University of Minho, Campus de Gualtar, 4710-057 Braga, Portugal.

<sup>2</sup>Advanced (Magnetic) Theranostic Nanostructures Lab, International Iberian Nanotechnology Laboratory, Av. Mestre José Veiga s/n, 4715-330 Braga, Portugal.

<sup>3</sup>Instituto de Parasitología y Biomedicina López Neyra, CSIC, PTS Granada, Avenida del Conocimiento, 17, 18016, Armilla, Granada, Spain.

\*Co-first authors; \*\*Corresponding author: mfox@quimica.uminho.pt

1. Synthesis and characterization of *meso*-substituted BODIPY derivatives **1f-i**..... 2

2. Synthesis and characterization of formylated BODIPY derivatives **2f**, **3c** and **3d**..... 4

**Figure S1.** Analysis of the chemical structure - antitrypanosomal activity relationship according to the selectivity index (SI) values of the BODIPY derivatives..... 6

**Figure S2.** Analysis of the chemical structure - antileishmanial activity relationship according to the selectivity index values of the BODIPY derivatives..... 7

**Table S1.** Inter-compound distances based on difference counts of Morgan fingerprints of radius 2, normalized so that the maximum distance between the BODIPY derivatives reported in this work was 1.0..... 7

**Figure S3.** Images of the most stable complexes of **1a** (a), **1b** (b), **1c** (c), **1d** (d), **1e** (e), and **1f** (f) with PRLm, as found in the molecular docking studies. The side chains of the most relevant amino acid residues are explicitly shown (clockwise, starting at noon: Ser146, Tyr37, Ser40, Ala15, Arg17, Val230, Pro224 and Phe113). ..... 8

**Figure S4.** Images of the most stable complexes of **1g** (a), **1i** (b), **1h** (c), **2a** (d), **2b** (e), and **2c** (f) with PRLm, as found in the molecular docking studies. The side chains of the most relevant amino acid residues are explicitly shown (clockwise, starting at noon: Ser146, Tyr37, Ser40, Ala15, Arg17, Val230, Pro224 and Phe113). ..... 9

**Figure S5.** Images of the most stable complexes of **2d** (a), **2e** (b), **2f** (c), **3a** (d), **3b** (e), and **3c** (f) with PRLm, as found in the molecular docking studies. The side chains of the most relevant amino acid residues are explicitly shown (clockwise, starting at noon: Ser146, Tyr37, Ser40, Ala15, Arg17, Val230, Pro224 and Phe113). ..... 10

**Figure S6.** Images of the most stable complexes of **3d** (a) and **4c** (b) with PRLm, as found in the molecular docking studies. The side chains of the most relevant amino acid residues are

|                                                                                                                                                                                                                                                                                                                                                                                             |    |
|---------------------------------------------------------------------------------------------------------------------------------------------------------------------------------------------------------------------------------------------------------------------------------------------------------------------------------------------------------------------------------------------|----|
| explicitly shown (clockwise, starting at noon: Ser146, Tyr37, Ser40, Ala15, Arg17, Val230, Pro224 and Phe113).....                                                                                                                                                                                                                                                                          | 11 |
| <b>Figure S7.</b> Images of the most stable complexes of <b>1a</b> (a), <b>1b</b> (b), <b>1c</b> (c), <b>1d</b> (d), <b>1e</b> (e), and <b>1f</b> (f) with PRTb, as found in the molecular docking studies. The side chains of the most relevant amino acid residues are explicitly shown (clockwise, starting at noon: Thr126, Tyr34, Ser37, Ala12, Arg14, Pro210, Pro204, and Phe97)..... | 12 |
| <b>Figure S8.</b> Images of the most stable complexes of <b>1g</b> (a), <b>1i</b> (b), <b>1h</b> (c), <b>2a</b> (d), <b>2b</b> (e), and <b>2c</b> (f) with PRTb, as found in the molecular docking studies. The side chains of the most relevant amino acid residues are explicitly shown (clockwise, starting at noon: Thr126, Tyr34, Ser37, Ala12, Arg14, Pro210, Pro204, and Phe97)..... | 12 |
| <b>Figure S9.</b> Images of the most stable complexes of <b>2d</b> (a), <b>2e</b> (b), <b>2f</b> (c), <b>3a</b> (d), <b>3b</b> (e), and <b>3c</b> (f) with PRTb, as found in the molecular docking studies. The side chains of the most relevant amino acid residues are explicitly shown (clockwise, starting at noon: Thr126, Tyr34, Ser37, Ala12, Arg14, Pro210, Pro204, and Phe97)..... | 13 |
| <b>Figure S10.</b> Images of the most stable complexes of <b>3d</b> (a), <b>4c</b> (b) with PRTb, as found in the molecular docking studies. The side chains of the most relevant amino acid residues are explicitly shown (clockwise, starting at noon: Thr126, Tyr34, Ser37, Ala12, Arg14, Pro210, Pro204, and Phe97).....                                                                | 14 |
| <b>Figure S11.</b> Adimensional affinities towards the amino acid residues in PRLm impacting the antileishmanial activity of BODIPY derivatives .....                                                                                                                                                                                                                                       | 15 |
| <b>Table S2.</b> Population of each binding mode for each complex PRLm-BODIPY derivative.....                                                                                                                                                                                                                                                                                               | 16 |
| <b>Table S3.</b> Population of each binding mode for each complex PRTb-BODIPY derivative.....                                                                                                                                                                                                                                                                                               | 28 |
| <b>3. Configuration of Autodock Vina used in the docking studies</b> .....                                                                                                                                                                                                                                                                                                                  | 40 |
| <b>3.1 For PRLm (protein structure extracted from PDB 2HQX)</b> .....                                                                                                                                                                                                                                                                                                                       | 40 |
| <b>3.2 For PRTb (protein structure extracted from PDB 4CM7)</b> .....                                                                                                                                                                                                                                                                                                                       | 40 |
| <b>4. Python Scripts</b> .....                                                                                                                                                                                                                                                                                                                                                              | 41 |
| <b>4.1. Script for finding the 10 closest contacts</b> .....                                                                                                                                                                                                                                                                                                                                | 41 |
| <b>4.2. Script for performing Principal Component Analysis on the affinity data</b> .....                                                                                                                                                                                                                                                                                                   | 43 |
| <b>5. References:</b> .....                                                                                                                                                                                                                                                                                                                                                                 | 45 |

## 1. Synthesis and characterization of *meso*-substituted BODIPY derivatives 1f-i

2,4-Dimethylpyrrole (2.0 mmol) and aldehyde **f-i** (1.0 mmol) were dissolved in dry dichloromethane (100 mL). One drop of trifluoroacetic acid was added and the mixture was allowed to stir for 50 min at room temperature. A solution of DDQ (2.0 mmol) in dry dichloromethane (100 mL) was added to the mixture. The reaction was stirred for another 50 min and then triethylamine (16.3 mmol) was added. After stirring for 15 min, BF<sub>3</sub>.OEt<sub>2</sub> (27.6 mmol) was added and further stirred for 30 min. The solvent was evaporated under reduced

pressure and the crude residue was purified by dry flash chromatography (petroleum ether/ethyl acetate, 4:1).

BODIPY derivative **1f** [1]

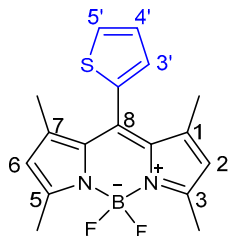

Yield = 8%;  $^1\text{H}$  NMR (400 MHz,  $\text{CDCl}_3$ ):  $\delta$  = 1.59 (s, 6H,  $\text{CH}_3$ -1 and  $\text{CH}_3$ -7), 2.56 (s, 6H,  $\text{CH}_3$ -3 and  $\text{CH}_3$ -5), 6.01 (s, 2H, H-2 and H-6), 6.99 (dd,  $J$  = 1.2 and 3.6 Hz, 1H, H-3'), 7.14 (t,  $J$  = 3.6 Hz, 1H, H-4'), 7.51 (dd,  $J$  = 1.2 and 5.2 Hz, 1H, H-5') ppm.

BODIPY derivative **1g** [2]

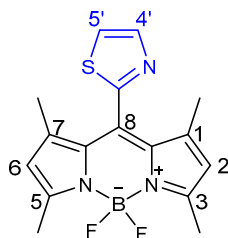

Yield = 7%;  $^1\text{H}$  NMR (400 MHz,  $\text{CDCl}_3$ ):  $\delta$  = 1.46 (s, 6H,  $\text{CH}_3$ -1 and  $\text{CH}_3$ -7), 2.56 (s, 6H,  $\text{CH}_3$ -3 and  $\text{CH}_3$ -5), 6.03 (s, 2H, H-2 and H-6), 7.64 (d,  $J$  = 3.2 Hz, 1H, H-5'), 8.02 (d,  $J$  = 3.6 Hz, 1H, H-4') ppm; HRMS (ESI)  $m/z$  :  $[\text{M} + 1]^+$  calcd for  $\text{C}_{16}\text{H}_{17}\text{BF}_2\text{N}_3\text{S}$ , 332.1199; found 332.1206.

BODIPY derivative **1h** [3]

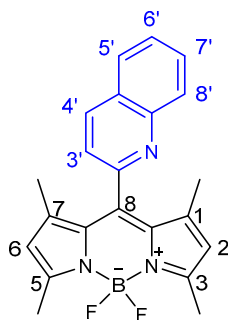

Yield = 37%;  $^1\text{H}$  NMR (400 MHz,  $\text{CDCl}_3$ ):  $\delta$  = 1.25 (s, 6H,  $\text{CH}_3$ -1 and  $\text{CH}_3$ -7), 2.56 (s, 6H,  $\text{CH}_3$ -3 and  $\text{CH}_3$ -5), 6.00 (s, 2H, H-2 and H-6), 7.60 (d, 1H, H-3'), 7.73 (dt,  $J$  = 1.2 and 8 Hz, 1H, H-6'), 7.88 (dt,  $J$  = 1.2 and 7.2 Hz, 3H, H-7'), 7.99 (d,  $J$  = 7.2 Hz, 1H, H-5'), 8.27 (d,  $J$  = 8.4 Hz, 1H, H-4'), 8.46 (d,  $J$  = 8.4 Hz, 1H, H-8') ppm; HRMS (ESI)  $m/z$ :  $[\text{M} + 1]^+$  calcd for  $\text{C}_{22}\text{H}_{21}\text{BF}_2\text{N}_3$ , 376.1791; found 376.1797.

#### BODIPY derivative **1i**

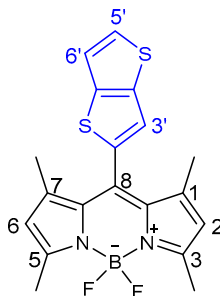

Yield = 3%;  $^1\text{H}$  RMN (400 MHz,  $\text{CDCl}_3$ ):  $\delta$  = 1.66 (s, 6H,  $\text{CH}_3$ -1 and  $\text{CH}_3$ -7), 2.57 (s, 6H,  $\text{CH}_3$ -3 and  $\text{CH}_3$ -5), 6.03 (s, 2H, H-2 and H-6), 7.19 (s, 1H, H-3'), 7.33 (dd,  $J$  = 0.8 and 5.2 Hz, 1H, H-5'), 7.46 (d,  $J$  = 5.2 Hz, 1H, H-6') ppm;  $^{13}\text{C}$  NMR (100.6 MHz,  $\text{CDCl}_3$ ):  $\delta$  = 13.95 ( $\text{CH}_3$ -1 and  $\text{CH}_3$ -7), 14.68 ( $\text{CH}_3$ -3 and  $\text{CH}_3$ -5), 119.58 ( $\text{C}5'$ ), 120.29 ( $\text{C}3'$ ), 121.62 ( $\text{C}2$  and  $\text{C}6$ ), 127.95 ( $\text{C}6'$ ), 132.45 ( $\text{C}8$ ), 132.93 ( $\text{C}2'$ ), 136.13 ( $\text{C}7\text{a}$  and  $\text{C}8\text{a}$ ), 139.01 ( $\text{C}3'\text{a}$ ), 140.28 ( $\text{C}6'\text{a}$ ), 143.57 ( $\text{C}1$  and  $\text{C}7$ ), 156.45 ( $\text{C}3$  and  $\text{C}5$ ) ppm; HRMS (ESI)  $m/z$  :  $[\text{M} + 1]^+$  calcd for  $\text{C}_{19}\text{H}_{18}\text{BF}_2\text{N}_2\text{S}_2$ , 387.0967; found 387.0965.

## 2. Synthesis and characterization of formylated BODIPY derivatives **2f**, **3c** and **3d**

A mixture of *N,N*-dimethylformamide (23 mmol) and  $\text{POCl}_3$  (18.2 mmol) was stirred for 5 min at 0 °C under  $\text{N}_2$  atmosphere. The mixture was allowed to reach room temperature and stirred for 30 min. The BODIPY precursor **1f**, **2c** or **1d** (0.127 mmol) dissolved in dichloroethane (7 mL) was added dropwise while stirring. The reaction mixture was heated for 2 h at 50 °C. After cooling, the solution was poured slowly into 40 mL of saturated sodium bicarbonate solution at 0 °C and stirred for 30 min at room temperature. Ethyl acetate (5 mL) was added to the reaction mixture and the resulting organic layer separated and washed with water (2 × 50 mL). The organic layer was dried with anhydrous  $\text{MgSO}_4$  and filtered. After evaporation of the solvent to dryness, the crude residue was purified by a silica gel chromatography column, using dichloromethane as eluent.

### BODIPY derivative **2f**

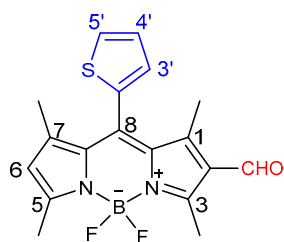

Yield = 49%;  $^1\text{H}$  NMR (400 MHz,  $\text{CDCl}_3$ ):  $\delta$  = 1.66 (s, 3H,  $\text{CH}_3$ -7), 1.86 (s, 3H,  $\text{CH}_3$ -1), 2.63 (s, 3H,  $\text{CH}_3$ -5), 2.83 (s, 3H,  $\text{CH}_3$ -3), 6.19 (s, 1H, H-6), 7.03 (dd,  $J$  = 1.2 and 3.6 Hz, 1H, H-3'), 7.19 (dd,  $J$  = 3.6 and 5.2 Hz, 1H, H-4'), 7.58 (dd,  $J$  = 1.2 and 4.8 Hz, 1H, H-5'), 10.04 (s, 1H, CHO) ppm;  $^{13}\text{C}$  NMR (100.6 MHz,  $\text{CDCl}_3$ ):  $\delta$  = 10.88 ( $\text{CH}_3$ -1), 13.05 ( $\text{CH}_3$ -3), 14.06 ( $\text{CH}_3$ -7), 15.18 ( $\text{CH}_3$ -5), 124.35 (C6), 126.44 (C2), 127.97 (C4'), 128.17 (C3' and C5'), 130.89 (C8a), 133.68 (C2'), 135.30 (C7a), 136.04 (C8), 143.20 (C1), 147.63 (C5), 156.89 (C3), 162.48 (C7), 185.95 (CHO) ppm.

### BODIPY derivative **3c**

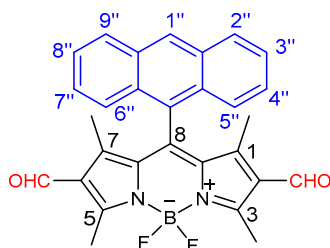

Yield = 10%;  $^1\text{H}$  NMR (400 MHz,  $\text{CDCl}_3$ ):  $\delta$  = 1.02 (s, 6H,  $\text{CH}_3$ -1 and  $\text{CH}_3$ -7), 2.97 (s, 6H,  $\text{CH}_3$ -3 and  $\text{CH}_3$ -5), 7.49 (dt,  $J$  = 1.2 and 8 Hz, 2H, H-3' and H-8'), 7.56 (dt,  $J$  = 1.2 and 8.4 Hz, 2H, H-4' and H-7'), 7.78 (dd,  $J$  = 0.8 and 8.8 Hz, 2H, H-2' and H-9'), 8.10 (d,  $J$  = 8.4 Hz, 2H, H-5' and H-6'), 8.69 (s, 1H, H-1'), 9.93 (s, 2H, C6-CHO and C2-CHO) ppm; HRMS (ESI)  $m/z$ :  $[\text{M} + 1]^+$  calcd for  $\text{C}_{29}\text{H}_{24}\text{BF}_2\text{N}_2\text{O}_2$ , 481.1893; found 481.1905.

### BODIPY derivative **3d**

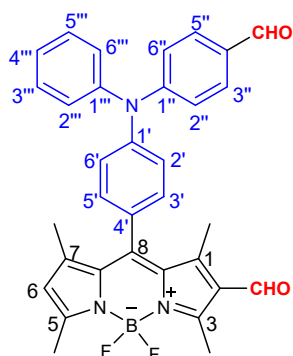

Yield = 26%;  $^1\text{H}$  NMR (400 MHz,  $\text{CDCl}_3$ ):  $\delta$  = 1.64 (s, 3H,  $\text{CH}_3$ -7), 1.86 (s, 3H,  $\text{CH}_3$ -1), 2.63 (s, 3H,  $\text{CH}_3$ -5), 2.82 (s, 3H,  $\text{CH}_3$ -3), 6.20 (s, 1H, H-6), 7.10 (d,  $J$ =8.8 Hz, 2H, H-2'' and H-6''), 7.18 (dd,  $J$ =1.2 and 8.4 Hz, 2H, H-3''' and H-5'''), 7.23 (m, 3H, H-4''', H-2' and H-6'), 7.32 (d,  $J$ =8.8 Hz, 2H, H-3' and H-5'), 7.38 (m, 2H, H-2''' and H-6'''), 7.75 (d,  $J$ =8.8 Hz, 2H, H-3'' and H-5''), 9.86 (s, 1H, C4''-CHO), 10.04 (s, 1H, C2-CHO);  $^{13}\text{C}$  NMR (100.6 MHz,  $\text{CDCl}_3$ ):  $\delta$  = 11.81 ( $\text{CH}_3$ -1), 12.87 ( $\text{CH}_3$ -3), 15.05 ( $\text{CH}_3$ -5 and  $\text{CH}_3$ -7), 120.81 (C2'' and C6''), 124.17 (C6), 125.62 (C4'''), 125.71 (C3' and C5'), 126.34 (C2, C3''' and C5'''), 129.19 (C2' and C6'), 129.61 (C4'), 129.88 (C1), 130.03 (C2''' and C6'''), 130.17 (C4''), 131.37 (C3'' and C5''), 134.19 (C7), 142.41 (C8a), 142.98 (C8), 145.87 (C1'''), 146.85 (C7a), 147.66 (C1'), 152.56 (C1''), 156.61 (C3), 161.82 (C5), 185.88 (C2-CHO), 190.38 (C4''-CHO); HRMS (ESI)  $m/z$ :  $[\text{M} + 1]^+$  calcd for  $\text{C}_{33}\text{H}_{29}\text{BF}_2\text{N}_3\text{O}_2$ , 548.2315; found 548.2341.

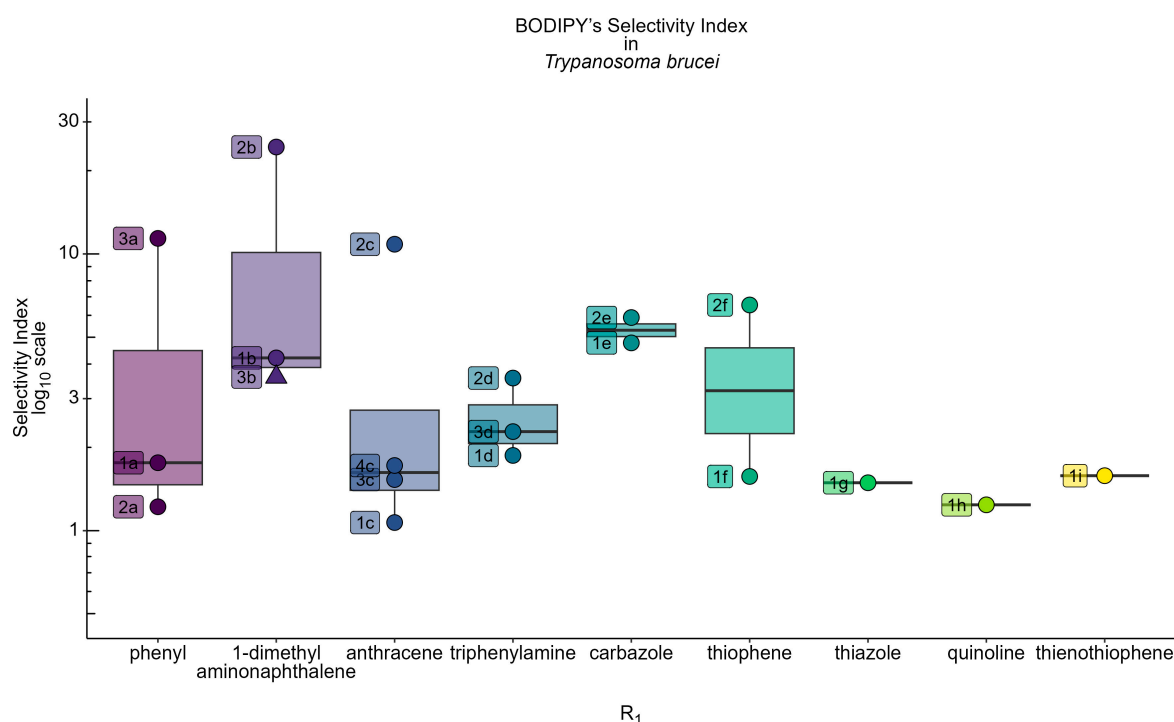

**Figure S1.** Analysis of the chemical structure - antitrypanosomal activity relationship according to the selectivity index (SI) values of the BODIPY derivatives. The BODIPYs were grouped based on the functionalization in position R<sub>1</sub> with different aromatic moieties and within each group the correspondent analogues functionalized in R<sub>2</sub> and/or R<sub>3</sub>. The compounds labeled with circles correspond to their exact SI values. Compounds labeled with a triangle pointing up or down indicate that their SI values are greater or lower, respectively, than the marked value.

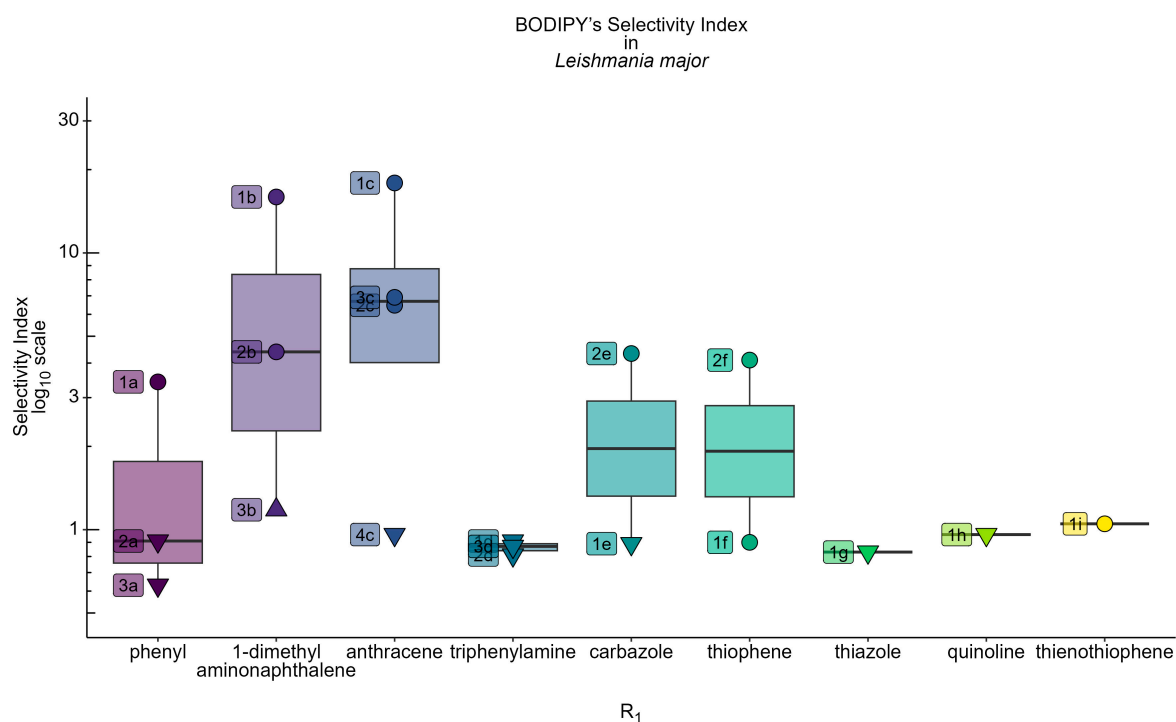

**Figure S2.** Analysis of the chemical structure - antileishmanial activity relationship according to the selectivity index values of the BODIPY derivatives. The BODIPYs were grouped based on the functionalization in position R<sub>1</sub> with different aromatic moieties and within each group the correspondent analogues functionalized in R<sub>2</sub> and/or R<sub>3</sub>. The compounds labeled with circles correspond to their exact SI values. Compounds labeled with a triangle pointing up or down indicate that their SI values are greater or lower, respectively, than the marked value.

**Table S1.** Inter-compound distances based on difference counts of Morgan fingerprints of radius 2, normalized so that the maximum distance between the BODIPY derivatives reported in this work was 1.0.

[Available in: Supplementary Materials\\_Table S1 \(Excel file\)](#)

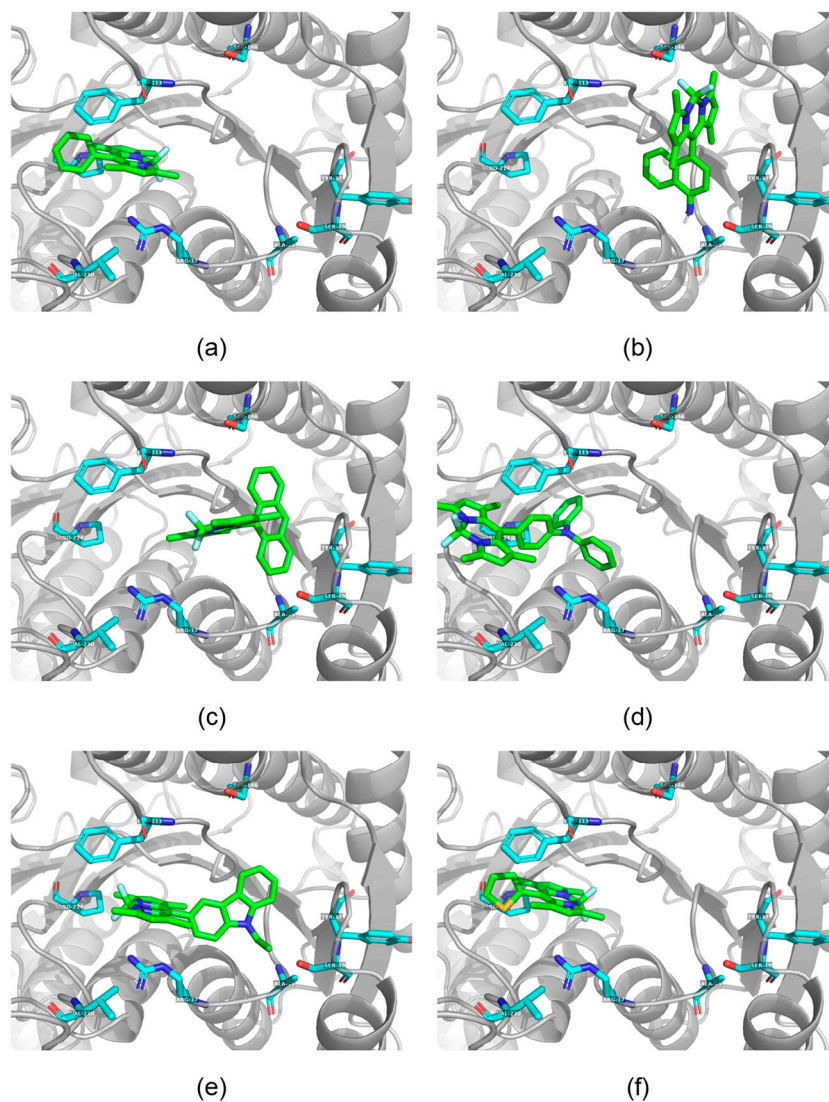

**Figure S3.** Images of the most stable complexes of **1a** (a), **1b** (b), **1c** (c), **1d** (d), **1e** (e), and **1f** (f) with PRLm, as found in the molecular docking studies. The side chains of the most relevant amino acid residues are explicitly shown (clockwise, starting at noon: Ser146, Tyr37, Ser40, Ala15, Arg17, Val230, Pro224 and Phe113).



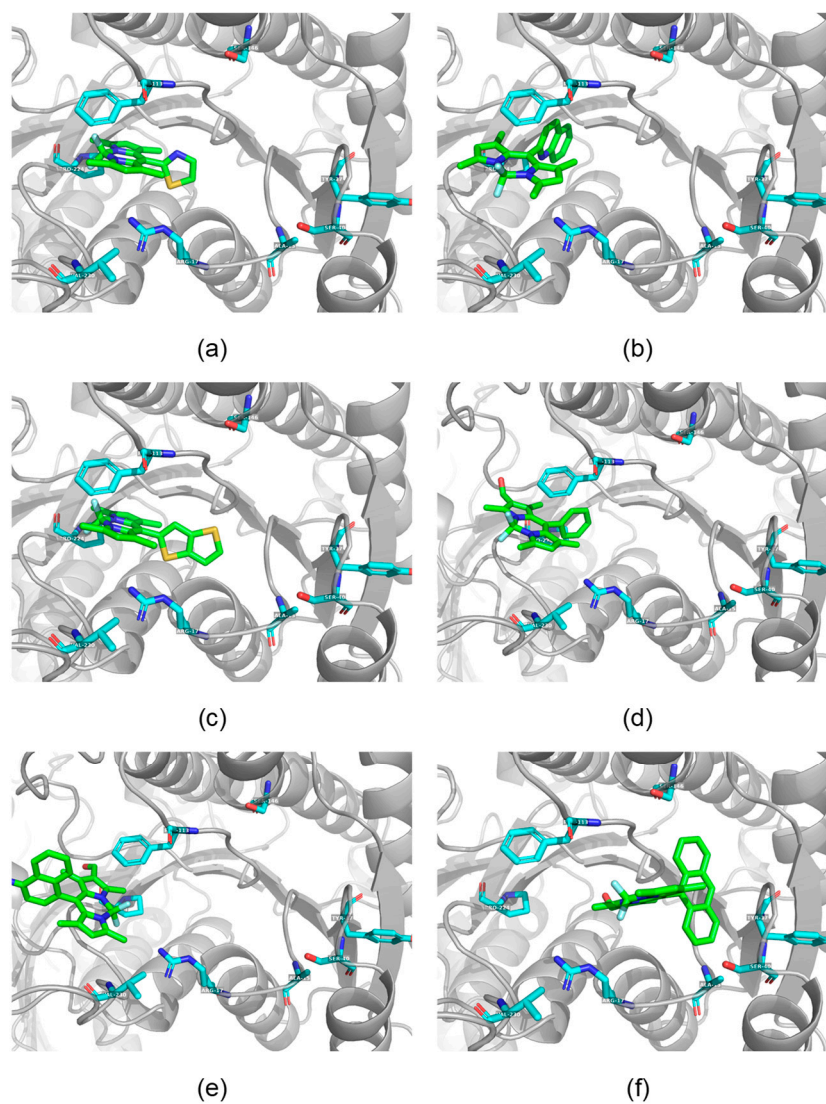

**Figure S4.** Images of the most stable complexes of **1g** (a), **1i** (b), **1h** (c), **2a** (d), **2b** (e), and **2c** (f) with PRLm, as found in the molecular docking studies. The side chains of the most relevant amino acid residues are explicitly shown (clockwise, starting at noon: Ser146, Tyr37, Ser40, Ala15, Arg17, Val230, Pro224 and Phe113).

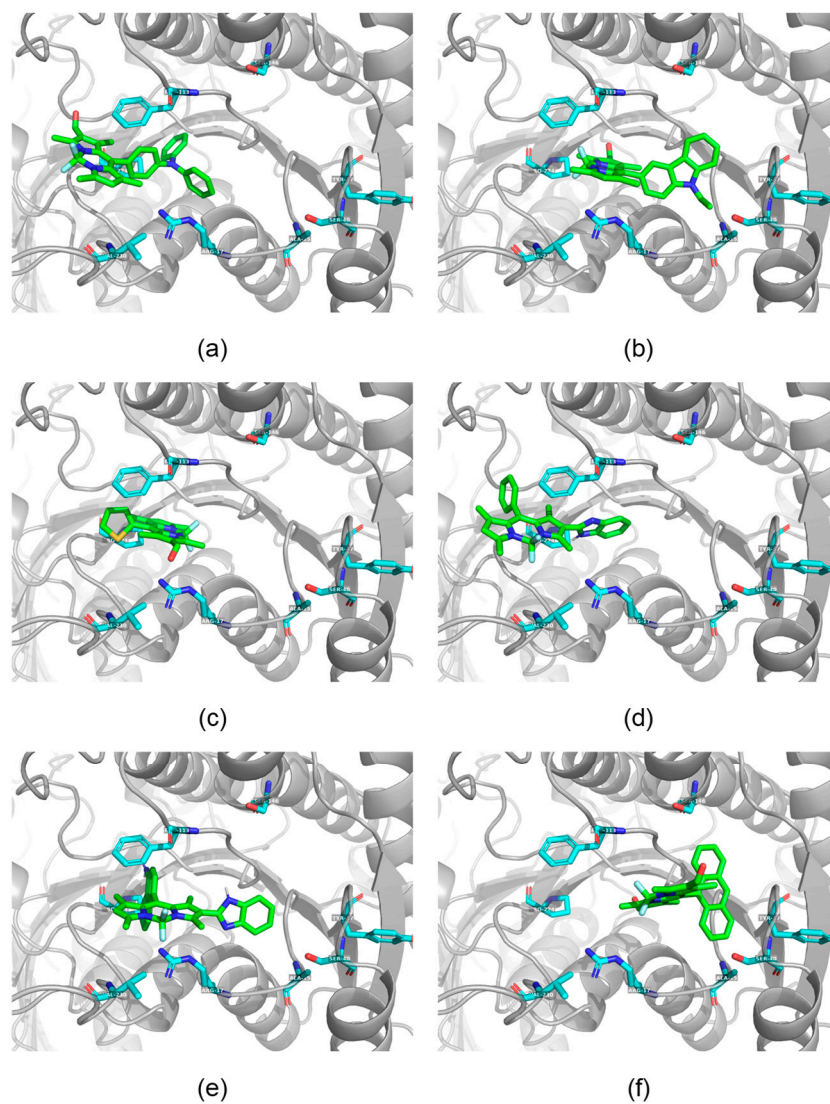

**Figure S5.** Images of the most stable complexes of **2d** (a), **2e** (b), **2f** (c), **3a** (d), **3b** (e), and **3c** (f) with PRLm, as found in the molecular docking studies. The side chains of the most relevant amino acid residues are explicitly shown (clockwise, starting at noon: Ser146, Tyr37, Ser40, Ala15, Arg17, Val230, Pro224 and Phe113).

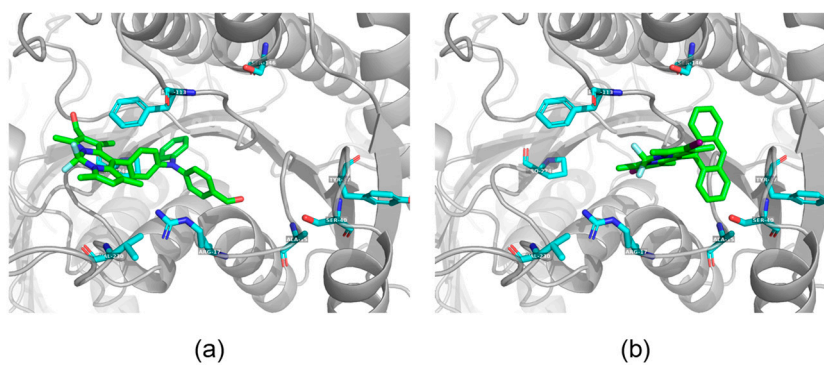

**Figure S6.** Images of the most stable complexes of **3d** (a) and **4c** (b) with PRLm, as found in the molecular docking studies. The side chains of the most relevant amino acid residues are explicitly shown (clockwise, starting at noon: Ser146, Tyr37, Ser40, Ala15, Arg17, Val230, Pro224 and Phe113).

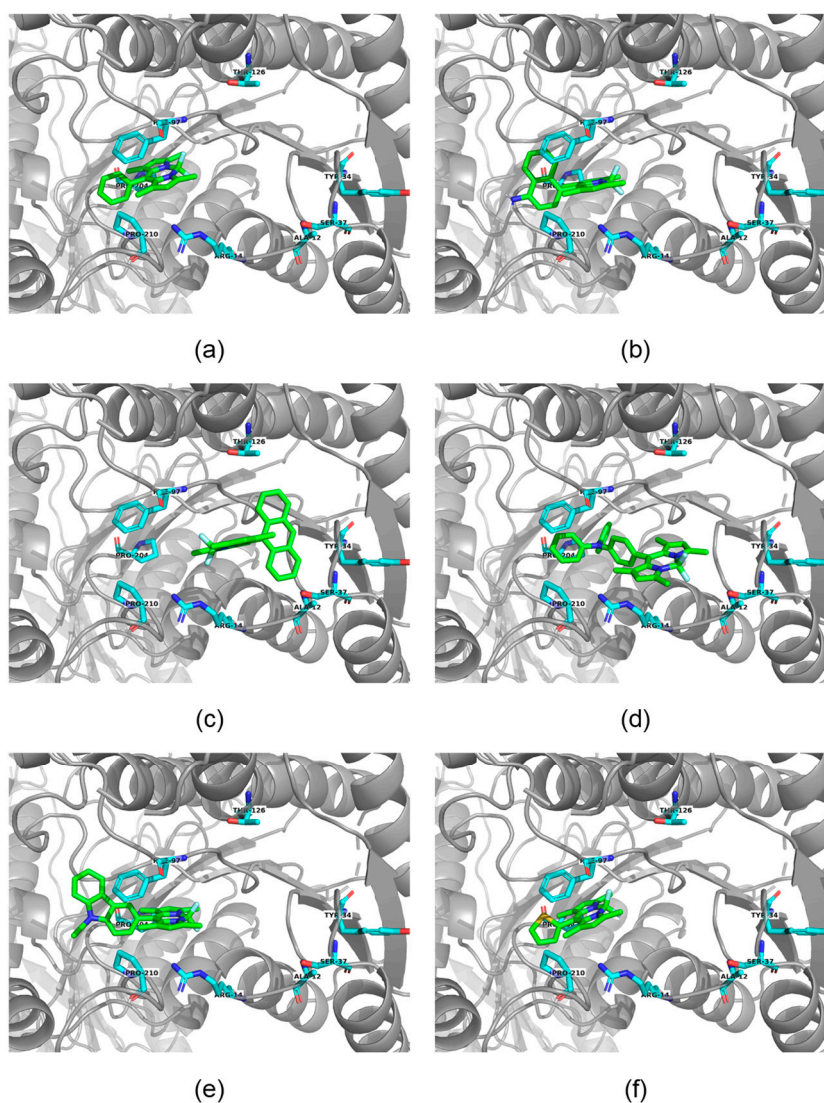



**Figure S7.** Images of the most stable complexes of **1a** (a), **1b** (b), **1c** (c), **1d** (d), **1e** (e), and **1f** (f) with PRTb, as found in the molecular docking studies. The side chains of the most relevant amino acid residues are explicitly shown (clockwise, starting at noon: Thr126, Tyr34, Ser37, Ala12, Arg14, Pro210, Pro204, and Phe97).

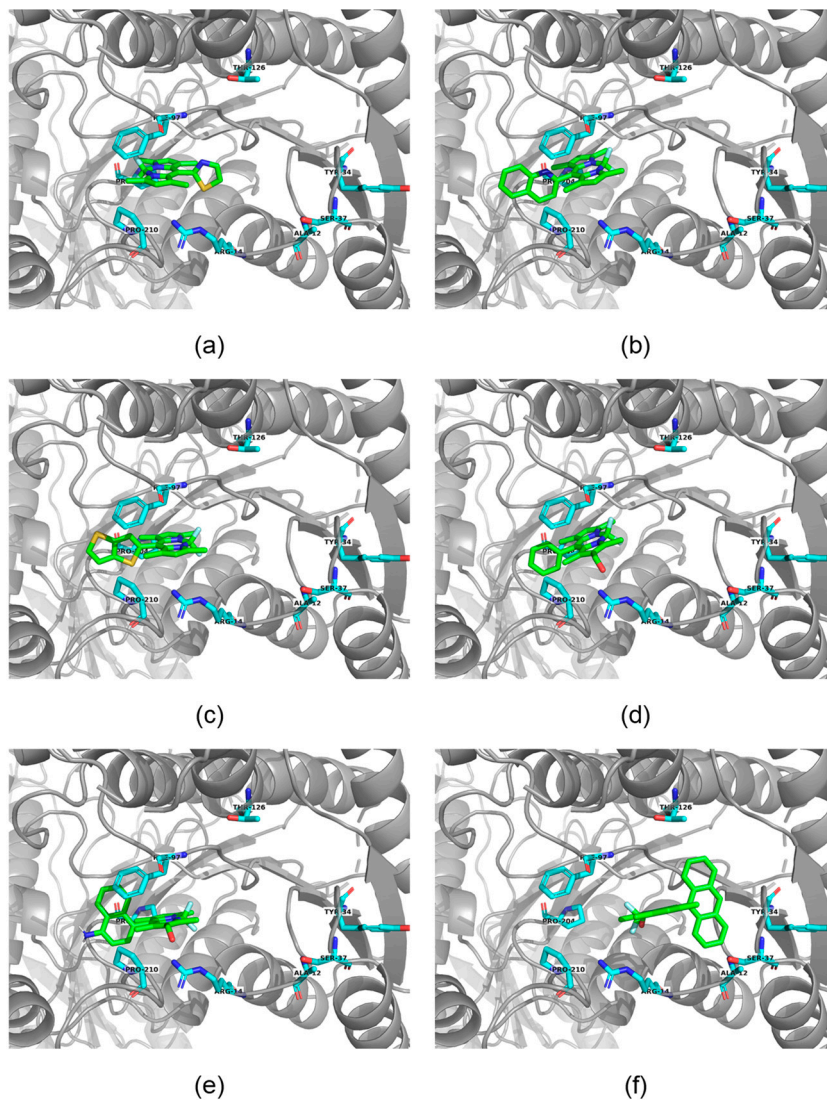

**Figure S8.** Images of the most stable complexes of **1g** (a), **1i** (b), **1h** (c), **2a** (d), **2b** (e), and **2c** (f) with PRTb, as found in the molecular docking studies. The side chains of the most relevant amino acid residues are explicitly shown (clockwise, starting at noon: Thr126, Tyr34, Ser37, Ala12, Arg14, Pro210, Pro204, and Phe97).

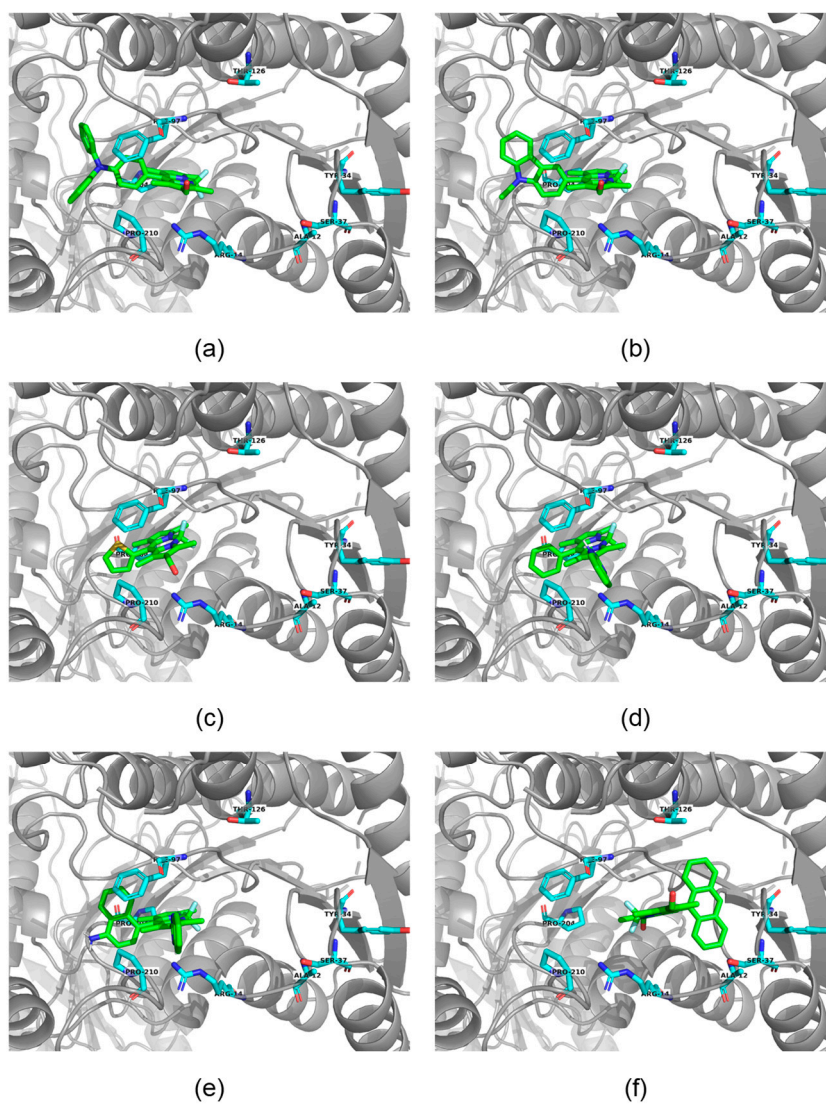

**Figure S9.** Images of the most stable complexes of **2d** (a), **2e** (b), **2f** (c), **3a** (d), **3b** (e), and **3c** (f) with PRTb, as found in the molecular docking studies. The side chains of the most relevant amino acid residues are explicitly shown (clockwise, starting at noon: Thr126, Tyr34, Ser37, Ala12, Arg14, Pro210, Pro204, and Phe97).

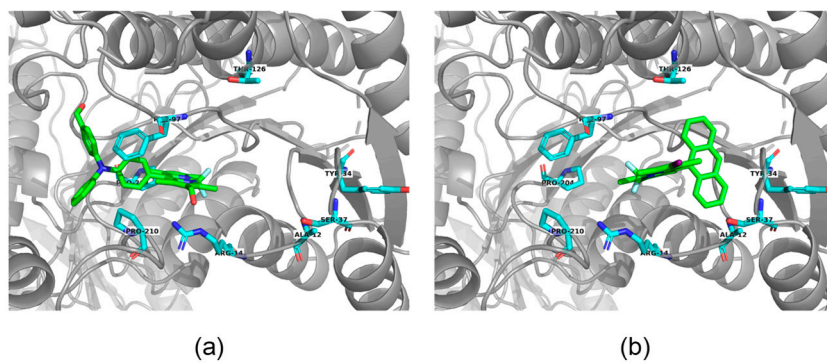

**Figure S10.** Images of the most stable complexes of **3d** (a), **4c** (b) with PRTb, as found in the molecular docking studies. The side chains of the most relevant amino acid residues are explicitly shown (clockwise, starting at noon: Thr126, Tyr34, Ser37, Ala12, Arg14, Pro210, Pro204, and Phe97).

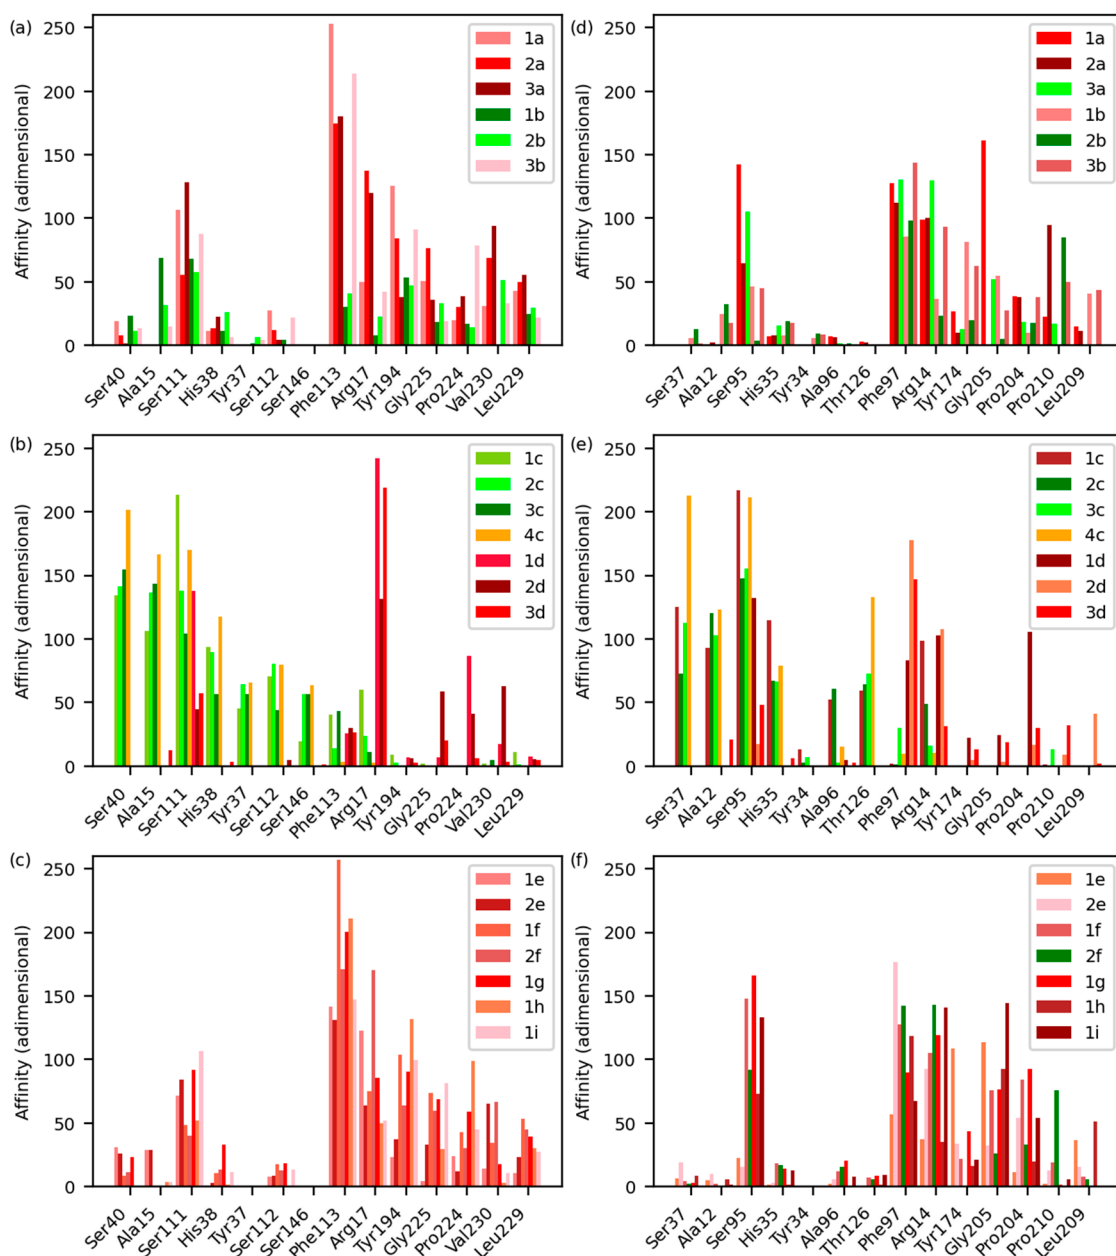

**Figure S11.** Adimensional affinities towards the amino acid residues in PRLm impacting the antileishmanial activity of BODIPY derivatives (according to the PCA analysis described in the main text): (a) compounds of the **a** and **b** series; (b) compounds of the **c** and **d** series; (c) compounds of the **e** , and **f** series, as well as **1g–1i**. Likewise, for the structural homologues in PRTb (d) compounds of the **a** and **b** series; (e) compounds of the **c** and **d** series; (f) compounds of the **e** , and **f** series, as well as **1g–1i**. Compounds showing antileishmanial activity are depicted in various shades of green in (a), (b) and (c), whereas those lacking antileishmanial activity are shown in various shades of red. A similar colour coding regarding antitrypanosomal activity is used in (d), (e) and (f).

**Table S2.** Population of each binding mode for each complex PRLm-BODIPY derivative.

| Ligand | Mode | Affinity_ kcal.mol <sup>-1</sup> | rmsd_L | rmsd_U | Z       | %Pop |
|--------|------|----------------------------------|--------|--------|---------|------|
| 1a     | 1    | -35.1104                         | 0.000  | 0.000  | 1.00000 | 6.9  |
| 1a     | 2    | -35.1062                         | 2.114  | 6.324  | 0.99833 | 6.9  |
| 1a     | 3    | -35.0979                         | 2.112  | 5.099  | 0.99501 | 6.9  |
| 1a     | 4    | -35.0813                         | 0.048  | 3.916  | 0.98839 | 6.9  |
| 1a     | 5    | -34.2992                         | 4.339  | 7.514  | 0.72237 | 5.0  |
| 1a     | 6    | -34.2534                         | 4.344  | 6.773  | 0.70924 | 4.9  |
| 1a     | 7    | -34.1411                         | 3.295  | 6.452  | 0.67801 | 4.7  |
| 1a     | 8    | -34.0954                         | 3.205  | 5.642  | 0.66569 | 4.6  |
| 1a     | 9    | -34.0787                         | 10.466 | 12.322 | 0.66126 | 4.6  |
| 1a     | 10   | -34.0662                         | 10.464 | 11.913 | 0.65796 | 4.6  |
| 1a     | 11   | -33.9539                         | 3.320  | 6.060  | 0.62899 | 4.4  |
| 1a     | 12   | -33.9373                         | 3.456  | 5.726  | 0.62481 | 4.3  |
| 1a     | 13   | -33.2758                         | 1.660  | 2.593  | 0.47927 | 3.3  |
| 1a     | 14   | -33.0470                         | 4.727  | 7.727  | 0.43726 | 3.0  |
| 1a     | 15   | -33.0262                         | 4.732  | 6.811  | 0.43363 | 3.0  |
| 1a     | 16   | -32.6227                         | 4.382  | 7.207  | 0.36886 | 2.6  |
| 1a     | 17   | -32.5437                         | 4.386  | 6.518  | 0.35736 | 2.5  |
| 1a     | 18   | -32.2858                         | 2.769  | 5.092  | 0.32225 | 2.2  |
| 1a     | 19   | -32.1360                         | 2.738  | 6.144  | 0.30347 | 2.1  |
| 1a     | 20   | -32.0736                         | 2.476  | 5.992  | 0.29598 | 2.1  |
| 1a     | 21   | -32.0486                         | 2.645  | 4.820  | 0.29303 | 2.0  |
| 1a     | 22   | -31.7824                         | 1.869  | 4.888  | 0.26336 | 1.8  |
| 1a     | 23   | -31.6202                         | 1.874  | 5.482  | 0.24678 | 1.7  |
| 1a     | 24   | -31.2250                         | 2.437  | 5.000  | 0.21062 | 1.5  |
| 1a     | 25   | -31.1459                         | 1.978  | 3.107  | 0.20405 | 1.4  |
| 1a     | 26   | -30.9670                         | 2.782  | 5.020  | 0.18993 | 1.3  |
| 1a     | 27   | -30.7590                         | 2.312  | 6.933  | 0.17473 | 1.2  |
| 1a     | 28   | -30.7466                         | 3.267  | 5.575  | 0.17386 | 1.2  |
| 1a     | 29   | -30.5885                         | 3.577  | 5.780  | 0.16318 | 1.1  |
| 1a     | 30   | -30.3056                         | 10.605 | 11.708 | 0.14569 | 1.0  |
| 1b     | 1    | -39.7197                         | 0.000  | 0.000  | 1.00000 | 9.0  |
| 1b     | 2    | -39.5949                         | 0.205  | 3.565  | 0.95120 | 8.6  |
| 1b     | 3    | -39.1622                         | 14.156 | 16.671 | 0.79973 | 7.2  |
| 1b     | 4    | -39.1414                         | 14.110 | 16.376 | 0.79309 | 7.1  |
| 1b     | 5    | -38.7421                         | 10.562 | 13.010 | 0.67575 | 6.1  |
| 1b     | 6    | -38.6256                         | 8.494  | 11.196 | 0.64492 | 5.8  |
| 1b     | 7    | -38.5882                         | 11.029 | 13.463 | 0.63531 | 5.7  |
| 1b     | 8    | -38.4717                         | 8.487  | 11.245 | 0.60633 | 5.5  |
| 1b     | 9    | -38.0682                         | 7.420  | 9.800  | 0.51576 | 4.6  |
| 1b     | 10   | -37.8269                         | 6.970  | 10.013 | 0.46821 | 4.2  |
| 1b     | 11   | -37.5814                         | 8.919  | 11.081 | 0.42433 | 3.8  |
| 1b     | 12   | -37.4067                         | 9.660  | 11.998 | 0.39563 | 3.6  |
| 1b     | 13   | -37.3318                         | 8.918  | 11.715 | 0.38393 | 3.5  |
| 1b     | 14   | -37.0074                         | 8.907  | 12.037 | 0.33710 | 3.0  |
| 1b     | 15   | -36.9408                         | 6.013  | 8.709  | 0.32822 | 3.0  |
| 1b     | 16   | -36.4624                         | 3.836  | 6.679  | 0.27094 | 2.4  |



|           |    |          |        |        |         |      |
|-----------|----|----------|--------|--------|---------|------|
| <b>1b</b> | 17 | -36.4166 | 3.831  | 6.198  | 0.26601 | 2.4  |
| <b>1b</b> | 18 | -35.6096 | 9.023  | 11.582 | 0.19248 | 1.7  |
| <b>1b</b> | 19 | -35.4432 | 10.691 | 12.882 | 0.18006 | 1.6  |
| <b>1b</b> | 20 | -35.4058 | 8.131  | 10.623 | 0.17738 | 1.6  |
| <b>1b</b> | 21 | -34.9440 | 3.145  | 6.060  | 0.14740 | 1.3  |
| <b>1b</b> | 22 | -34.6611 | 8.777  | 11.254 | 0.13160 | 1.2  |
| <b>1b</b> | 23 | -34.5363 | 1.730  | 4.203  | 0.12517 | 1.1  |
| <b>1b</b> | 24 | -34.4490 | 13.884 | 16.155 | 0.12087 | 1.1  |
| <b>1b</b> | 25 | -34.3616 | 7.337  | 9.672  | 0.11671 | 1.1  |
| <b>1b</b> | 26 | -34.3574 | 4.579  | 7.360  | 0.11651 | 1.0  |
| <b>1b</b> | 27 | -33.4922 | 2.455  | 5.505  | 0.08236 | 0.7  |
| <b>1b</b> | 28 | -33.3923 | 2.457  | 5.974  | 0.07913 | 0.7  |
| <b>1b</b> | 29 | -33.3507 | 16.612 | 18.598 | 0.07782 | 0.7  |
| <b>1b</b> | 30 | -32.9014 | 3.059  | 5.114  | 0.06499 | 0.6  |
| <b>1c</b> | 1  | -40.1898 | 0.000  | 0.000  | 1.00000 | 13.8 |
| <b>1c</b> | 2  | -40.1731 | 0.042  | 3.391  | 0.99335 | 13.7 |
| <b>1c</b> | 3  | -40.1565 | 0.017  | 4.677  | 0.98675 | 13.6 |
| <b>1c</b> | 4  | -40.1315 | 0.047  | 3.221  | 0.97692 | 13.5 |
| <b>1c</b> | 5  | -36.2586 | 1.977  | 5.234  | 0.20679 | 2.9  |
| <b>1c</b> | 6  | -36.2502 | 1.987  | 4.438  | 0.20610 | 2.8  |
| <b>1c</b> | 7  | -36.2211 | 1.977  | 4.569  | 0.20371 | 2.8  |
| <b>1c</b> | 8  | -36.2170 | 1.989  | 5.128  | 0.20337 | 2.8  |
| <b>1c</b> | 9  | -35.8550 | 2.644  | 6.296  | 0.17590 | 2.4  |
| <b>1c</b> | 10 | -35.7760 | 2.637  | 6.367  | 0.17042 | 2.4  |
| <b>1c</b> | 11 | -35.7594 | 2.653  | 5.918  | 0.16928 | 2.3  |
| <b>1c</b> | 12 | -35.6720 | 14.205 | 16.787 | 0.16346 | 2.3  |
| <b>1c</b> | 13 | -35.6637 | 14.175 | 16.989 | 0.16291 | 2.2  |
| <b>1c</b> | 14 | -35.6138 | 3.267  | 7.402  | 0.15968 | 2.2  |
| <b>1c</b> | 15 | -35.6096 | 3.274  | 7.867  | 0.15942 | 2.2  |
| <b>1c</b> | 16 | -35.0022 | 2.408  | 5.519  | 0.12497 | 1.7  |
| <b>1c</b> | 17 | -34.8899 | 1.960  | 4.046  | 0.11946 | 1.6  |
| <b>1c</b> | 18 | -34.8816 | 1.953  | 3.274  | 0.11907 | 1.6  |
| <b>1c</b> | 19 | -34.8026 | 1.968  | 4.896  | 0.11535 | 1.6  |
| <b>1c</b> | 20 | -34.7734 | 2.421  | 5.226  | 0.11401 | 1.6  |
| <b>1c</b> | 21 | -34.5738 | 2.439  | 4.730  | 0.10524 | 1.5  |
| <b>1c</b> | 22 | -34.4947 | 2.438  | 5.122  | 0.10196 | 1.4  |
| <b>1c</b> | 23 | -34.0538 | 1.871  | 4.550  | 0.08544 | 1.2  |
| <b>1c</b> | 24 | -33.7293 | 4.995  | 7.771  | 0.07502 | 1.0  |
| <b>1c</b> | 25 | -33.7168 | 4.879  | 7.271  | 0.07464 | 1.0  |
| <b>1c</b> | 26 | -33.6294 | 4.956  | 8.095  | 0.07207 | 1.0  |
| <b>1c</b> | 27 | -32.8557 | 2.687  | 6.424  | 0.05285 | 0.7  |
| <b>1c</b> | 28 | -32.8432 | 2.680  | 6.435  | 0.05259 | 0.7  |
| <b>1c</b> | 29 | -32.7392 | 2.681  | 6.703  | 0.05044 | 0.7  |
| <b>1c</b> | 30 | -32.6435 | 2.696  | 5.680  | 0.04854 | 0.7  |
| <b>1d</b> | 1  | -44.9904 | 0.000  | 0.000  | 1.00000 | 17.4 |
| <b>1d</b> | 2  | -44.8906 | 0.131  | 3.153  | 0.96076 | 16.7 |
| <b>1d</b> | 3  | -44.8614 | 0.166  | 4.418  | 0.94961 | 16.5 |
| <b>1d</b> | 4  | -44.8323 | 0.080  | 3.096  | 0.93859 | 16.3 |
| <b>1d</b> | 5  | -40.4310 | 4.861  | 9.489  | 0.16075 | 2.8  |
| <b>1d</b> | 6  | -40.4019 | 1.450  | 4.649  | 0.15889 | 2.8  |

|    |    |          |       |        |         |     |
|----|----|----------|-------|--------|---------|-----|
| 1d | 7  | -40.3770 | 4.862 | 9.708  | 0.15731 | 2.7 |
| 1d | 8  | -40.2979 | 1.448 | 3.493  | 0.15240 | 2.6 |
| 1d | 9  | -40.1274 | 4.864 | 9.633  | 0.14233 | 2.5 |
| 1d | 10 | -40.0733 | 4.868 | 9.460  | 0.13927 | 2.4 |
| 1d | 11 | -38.7130 | 3.185 | 8.794  | 0.08073 | 1.4 |
| 1d | 12 | -38.7130 | 4.835 | 9.186  | 0.08073 | 1.4 |
| 1d | 13 | -38.5715 | 3.167 | 8.304  | 0.07628 | 1.3 |
| 1d | 14 | -38.5133 | 3.171 | 9.283  | 0.07452 | 1.3 |
| 1d | 15 | -38.4384 | 4.841 | 9.472  | 0.07231 | 1.3 |
| 1d | 16 | -38.3968 | 3.233 | 6.001  | 0.07112 | 1.2 |
| 1d | 17 | -38.3885 | 3.168 | 8.814  | 0.07088 | 1.2 |
| 1d | 18 | -38.3677 | 3.278 | 6.533  | 0.07029 | 1.2 |
| 1d | 19 | -38.2970 | 3.270 | 6.400  | 0.06833 | 1.2 |
| 1d | 20 | -38.1888 | 3.246 | 5.902  | 0.06543 | 1.1 |
| 1d | 21 | -37.0573 | 4.440 | 8.887  | 0.04157 | 0.7 |
| 1d | 22 | -36.7744 | 4.677 | 8.989  | 0.03711 | 0.6 |
| 1d | 23 | -36.6288 | 4.645 | 9.090  | 0.03501 | 0.6 |
| 1d | 24 | -36.1962 | 3.640 | 5.898  | 0.02943 | 0.5 |
| 1d | 25 | -36.1920 | 1.654 | 3.767  | 0.02938 | 0.5 |
| 1d | 26 | -35.6096 | 4.046 | 7.900  | 0.02326 | 0.4 |
| 1d | 27 | -35.1645 | 4.185 | 7.655  | 0.01946 | 0.3 |
| 1d | 28 | -35.1603 | 4.163 | 7.650  | 0.01943 | 0.3 |
| 1d | 29 | -35.1021 | 4.177 | 7.796  | 0.01898 | 0.3 |
| 1d | 30 | -35.0938 | 4.195 | 7.884  | 0.01892 | 0.3 |
| 1e | 1  | -40.2730 | 0.000 | 0.000  | 1.00000 | 7.3 |
| 1e | 2  | -40.2438 | 0.065 | 3.339  | 0.98839 | 7.2 |
| 1e | 3  | -39.6448 | 2.967 | 5.800  | 0.77737 | 5.7 |
| 1e | 4  | -39.4035 | 8.035 | 13.741 | 0.70570 | 5.2 |
| 1e | 5  | -39.3494 | 8.015 | 14.206 | 0.69056 | 5.1 |
| 1e | 6  | -39.3370 | 2.975 | 4.947  | 0.68712 | 5.0 |
| 1e | 7  | -39.2122 | 8.060 | 13.380 | 0.65358 | 4.8 |
| 1e | 8  | -39.1664 | 8.018 | 13.870 | 0.64170 | 4.7 |
| 1e | 9  | -39.0582 | 6.695 | 9.154  | 0.61447 | 4.5 |
| 1e | 10 | -39.0541 | 6.704 | 9.534  | 0.61345 | 4.5 |
| 1e | 11 | -38.8461 | 3.816 | 7.241  | 0.56437 | 4.1 |
| 1e | 12 | -38.7338 | 3.822 | 6.580  | 0.53952 | 3.9 |
| 1e | 13 | -38.0058 | 2.634 | 5.372  | 0.40295 | 2.9 |
| 1e | 14 | -37.9725 | 9.697 | 14.287 | 0.39761 | 2.9 |
| 1e | 15 | -37.9059 | 5.153 | 8.806  | 0.38714 | 2.8 |
| 1e | 16 | -37.9059 | 9.675 | 14.066 | 0.38714 | 2.8 |
| 1e | 17 | -37.8726 | 3.181 | 8.467  | 0.38201 | 2.8 |
| 1e | 18 | -37.8602 | 5.384 | 8.683  | 0.38010 | 2.8 |
| 1e | 19 | -37.7104 | 3.190 | 8.007  | 0.35795 | 2.6 |
| 1e | 20 | -37.4608 | 3.278 | 7.677  | 0.32387 | 2.4 |
| 1e | 21 | -37.2070 | 2.847 | 5.177  | 0.29254 | 2.1 |
| 1e | 22 | -37.1530 | 3.383 | 8.143  | 0.28627 | 2.1 |
| 1e | 23 | -36.7078 | 2.905 | 4.201  | 0.23948 | 1.8 |
| 1e | 24 | -36.6621 | 3.084 | 7.271  | 0.23513 | 1.7 |
| 1e | 25 | -36.6038 | 3.192 | 8.243  | 0.22970 | 1.7 |
| 1e | 26 | -36.3584 | 4.529 | 7.180  | 0.20817 | 1.5 |

|    |    |          |        |        |         |     |
|----|----|----------|--------|--------|---------|-----|
| 1e | 27 | -36.1629 | 4.274  | 10.083 | 0.19248 | 1.4 |
| 1e | 28 | -36.0381 | 4.689  | 7.437  | 0.18309 | 1.3 |
| 1e | 29 | -35.6138 | 10.073 | 14.374 | 0.15445 | 1.1 |
| 1e | 30 | -35.5098 | 14.320 | 19.555 | 0.14814 | 1.1 |
| 1f | 1  | -33.6003 | 0.000  | 0.000  | 1.00000 | 8.6 |
| 1f | 2  | -33.5670 | 0.117  | 4.017  | 0.98675 | 8.5 |
| 1f | 3  | -32.9805 | 2.493  | 4.810  | 0.77997 | 6.7 |
| 1f | 4  | -32.9139 | 2.489  | 6.158  | 0.75943 | 6.6 |
| 1f | 5  | -31.9987 | 4.473  | 6.862  | 0.52619 | 4.5 |
| 1f | 6  | -31.9571 | 4.494  | 7.621  | 0.51749 | 4.5 |
| 1f | 7  | -31.9280 | 3.252  | 6.164  | 0.51148 | 4.4 |
| 1f | 8  | -31.7990 | 10.500 | 12.198 | 0.48571 | 4.2 |
| 1f | 9  | -31.7782 | 1.488  | 4.224  | 0.48167 | 4.2 |
| 1f | 10 | -31.7283 | 3.362  | 5.473  | 0.47213 | 4.1 |
| 1f | 11 | -31.5744 | 1.501  | 2.533  | 0.44388 | 3.8 |
| 1f | 12 | -31.4746 | 3.240  | 5.572  | 0.42646 | 3.7 |
| 1f | 13 | -31.3622 | 3.229  | 5.864  | 0.40768 | 3.5 |
| 1f | 14 | -30.9920 | 3.358  | 5.455  | 0.35145 | 3.0 |
| 1f | 15 | -30.9046 | 4.537  | 7.327  | 0.33935 | 2.9 |
| 1f | 16 | -30.9046 | 4.519  | 6.644  | 0.33935 | 2.9 |
| 1f | 17 | -30.7424 | 4.268  | 7.461  | 0.31798 | 2.7 |
| 1f | 18 | -30.6966 | 4.696  | 6.598  | 0.31220 | 2.7 |
| 1f | 19 | -30.6342 | 4.706  | 7.610  | 0.30449 | 2.6 |
| 1f | 20 | -30.3680 | 4.133  | 6.834  | 0.27366 | 2.4 |
| 1f | 21 | -29.8979 | 2.362  | 4.572  | 0.22666 | 2.0 |
| 1f | 22 | -29.8896 | 4.092  | 6.606  | 0.22590 | 2.0 |
| 1f | 23 | -29.4445 | 4.803  | 7.397  | 0.18898 | 1.6 |
| 1f | 24 | -29.3072 | 4.260  | 6.544  | 0.17886 | 1.5 |
| 1f | 25 | -28.8538 | 3.331  | 5.832  | 0.14913 | 1.3 |
| 1f | 26 | -28.7706 | 6.649  | 9.361  | 0.14424 | 1.2 |
| 1f | 27 | -28.5667 | 2.937  | 6.929  | 0.13292 | 1.1 |
| 1f | 28 | -28.1299 | 7.163  | 9.679  | 0.11157 | 1.0 |
| 1f | 29 | -27.6474 | 21.178 | 22.601 | 0.09194 | 0.8 |
| 1f | 30 | -27.5933 | 21.166 | 22.911 | 0.08997 | 0.8 |
| 1g | 1  | -32.8598 | 0.000  | 0.000  | 1.00000 | 7.8 |
| 1g | 2  | -32.8598 | 0.143  | 4.008  | 1.00000 | 7.8 |
| 1g | 3  | -32.0154 | 2.501  | 6.113  | 0.71280 | 5.6 |
| 1g | 4  | -31.9946 | 2.513  | 4.760  | 0.70688 | 5.5 |
| 1g | 5  | -31.6077 | 2.423  | 5.881  | 0.60532 | 4.7 |
| 1g | 6  | -31.5869 | 9.721  | 11.285 | 0.60029 | 4.7 |
| 1g | 7  | -31.5744 | 2.440  | 4.679  | 0.59730 | 4.7 |
| 1g | 8  | -31.5411 | 9.668  | 10.792 | 0.58938 | 4.6 |
| 1g | 9  | -31.1709 | 4.192  | 6.610  | 0.50808 | 4.0 |
| 1g | 10 | -31.0128 | 3.496  | 6.237  | 0.47688 | 3.7 |
| 1g | 11 | -30.7424 | 3.628  | 6.306  | 0.42789 | 3.3 |
| 1g | 12 | -30.5968 | 2.860  | 4.597  | 0.40362 | 3.1 |
| 1g | 13 | -30.5594 | 4.640  | 7.986  | 0.39761 | 3.1 |
| 1g | 14 | -30.5094 | 4.586  | 8.112  | 0.38973 | 3.0 |
| 1g | 15 | -30.4678 | 4.101  | 7.077  | 0.38329 | 3.0 |
| 1g | 16 | -30.2973 | 1.968  | 3.001  | 0.35795 | 2.8 |

|    |    |          |        |        |         |      |
|----|----|----------|--------|--------|---------|------|
| 1g | 17 | -30.0810 | 2.956  | 5.553  | 0.32822 | 2.6  |
| 1g | 18 | -29.9062 | 5.545  | 9.446  | 0.30601 | 2.4  |
| 1g | 19 | -29.8189 | 2.058  | 4.577  | 0.29548 | 2.3  |
| 1g | 20 | -29.8022 | 1.677  | 2.699  | 0.29352 | 2.3  |
| 1g | 21 | -29.7898 | 3.435  | 5.226  | 0.29205 | 2.3  |
| 1g | 22 | -29.7690 | 4.906  | 8.291  | 0.28963 | 2.3  |
| 1g | 23 | -29.5734 | 3.379  | 6.334  | 0.26779 | 2.1  |
| 1g | 24 | -29.5318 | 5.549  | 8.721  | 0.26336 | 2.1  |
| 1g | 25 | -29.4861 | 3.471  | 6.475  | 0.25858 | 2.0  |
| 1g | 26 | -29.3779 | 2.043  | 3.863  | 0.24760 | 1.9  |
| 1g | 27 | -29.0368 | 10.171 | 11.237 | 0.21595 | 1.7  |
| 1g | 28 | -28.9786 | 3.327  | 5.500  | 0.21097 | 1.6  |
| 1g | 29 | -28.9037 | 6.581  | 9.692  | 0.20473 | 1.6  |
| 1g | 30 | -28.8954 | 2.801  | 5.021  | 0.20405 | 1.6  |
| 1h | 1  | -41.7123 | 0.000  | 0.000  | 1.00000 | 15.3 |
| 1h | 2  | -41.3629 | 0.259  | 3.631  | 0.86928 | 13.3 |
| 1h | 3  | -40.0275 | 3.357  | 5.454  | 0.50893 | 7.8  |
| 1h | 4  | -39.6448 | 2.943  | 6.042  | 0.43654 | 6.7  |
| 1h | 5  | -39.5366 | 3.007  | 6.711  | 0.41801 | 6.4  |
| 1h | 6  | -39.3869 | 1.950  | 3.149  | 0.39365 | 6.0  |
| 1h | 7  | -38.7088 | 1.960  | 4.634  | 0.29995 | 4.6  |
| 1h | 8  | -38.5882 | 1.258  | 3.959  | 0.28579 | 4.4  |
| 1h | 9  | -38.5590 | 2.965  | 5.190  | 0.28247 | 4.3  |
| 1h | 10 | -37.4816 | 2.923  | 7.707  | 0.18339 | 2.8  |
| 1h | 11 | -37.3485 | 4.248  | 6.682  | 0.17386 | 2.7  |
| 1h | 12 | -37.2736 | 3.098  | 8.337  | 0.16872 | 2.6  |
| 1h | 13 | -37.1904 | 4.305  | 6.468  | 0.16318 | 2.5  |
| 1h | 14 | -37.0573 | 1.898  | 2.643  | 0.15470 | 2.4  |
| 1h | 15 | -36.6205 | 5.313  | 7.908  | 0.12985 | 2.0  |
| 1h | 16 | -36.6038 | 1.938  | 4.022  | 0.12899 | 2.0  |
| 1h | 17 | -36.4000 | 3.009  | 8.418  | 0.11887 | 1.8  |
| 1h | 18 | -36.2336 | 4.120  | 6.674  | 0.11120 | 1.7  |
| 1h | 19 | -35.9258 | 5.683  | 8.434  | 0.09829 | 1.5  |
| 1h | 20 | -35.7469 | 1.284  | 1.918  | 0.09148 | 1.4  |
| 1h | 21 | -35.5139 | 5.390  | 7.731  | 0.08333 | 1.3  |
| 1h | 22 | -35.2810 | 3.348  | 7.819  | 0.07590 | 1.2  |
| 1h | 23 | -34.6154 | 2.292  | 4.266  | 0.05812 | 0.9  |
| 1h | 24 | -34.4282 | 1.927  | 2.454  | 0.05392 | 0.8  |
| 1h | 25 | -34.3574 | 2.631  | 6.647  | 0.05241 | 0.8  |
| 1h | 26 | -34.1702 | 3.301  | 7.936  | 0.04862 | 0.7  |
| 1h | 27 | -33.9082 | 9.997  | 12.676 | 0.04377 | 0.7  |
| 1h | 28 | -33.8998 | 3.290  | 8.639  | 0.04363 | 0.7  |
| 1h | 29 | -33.7584 | 20.179 | 22.003 | 0.04122 | 0.6  |
| 1h | 30 | -33.3590 | 20.243 | 22.104 | 0.03512 | 0.5  |
| 1i | 1  | -37.1155 | 0.000  | 0.000  | 1.00000 | 13.8 |
| 1i | 2  | -37.0365 | 0.024  | 3.766  | 0.96881 | 13.4 |
| 1i | 3  | -35.9299 | 4.204  | 6.280  | 0.62169 | 8.6  |
| 1i | 4  | -35.8259 | 4.297  | 6.935  | 0.59630 | 8.2  |
| 1i | 5  | -35.4890 | 3.868  | 5.715  | 0.52095 | 7.2  |
| 1i | 6  | -35.1229 | 3.208  | 6.231  | 0.44984 | 6.2  |

|    |    |          |        |        |         |     |
|----|----|----------|--------|--------|---------|-----|
| 1i | 7  | -35.0896 | 3.203  | 7.194  | 0.44388 | 6.1 |
| 1i | 8  | -34.2576 | 1.301  | 4.102  | 0.31798 | 4.4 |
| 1i | 9  | -33.1178 | 6.434  | 10.478 | 0.20135 | 2.8 |
| 1i | 10 | -32.7184 | 6.358  | 10.887 | 0.17156 | 2.4 |
| 1i | 11 | -32.5894 | 8.421  | 10.137 | 0.16291 | 2.2 |
| 1i | 12 | -32.4854 | 3.748  | 6.487  | 0.15626 | 2.2 |
| 1i | 13 | -32.4688 | 3.739  | 7.146  | 0.15522 | 2.1 |
| 1i | 14 | -32.4397 | 3.667  | 6.793  | 0.15342 | 2.1 |
| 1i | 15 | -32.3315 | 4.505  | 7.443  | 0.14691 | 2.0 |
| 1i | 16 | -31.7616 | 2.139  | 3.056  | 0.11690 | 1.6 |
| 1i | 17 | -31.7200 | 1.652  | 2.203  | 0.11497 | 1.6 |
| 1i | 18 | -31.6118 | 2.123  | 4.451  | 0.11009 | 1.5 |
| 1i | 19 | -31.5411 | 3.387  | 7.265  | 0.10701 | 1.5 |
| 1i | 20 | -30.9379 | 2.941  | 4.394  | 0.08402 | 1.2 |
| 1i | 21 | -30.7424 | 6.839  | 9.883  | 0.07769 | 1.1 |
| 1i | 22 | -30.7382 | 9.402  | 11.009 | 0.07756 | 1.1 |
| 1i | 23 | -30.6675 | 6.926  | 10.025 | 0.07539 | 1.0 |
| 1i | 24 | -30.5261 | 9.296  | 11.151 | 0.07124 | 1.0 |
| 1i | 25 | -30.3597 | 3.599  | 6.744  | 0.06664 | 0.9 |
| 1i | 26 | -30.2266 | 4.687  | 7.480  | 0.06318 | 0.9 |
| 1i | 27 | -29.9853 | 5.458  | 9.335  | 0.05735 | 0.8 |
| 1i | 28 | -29.8646 | 6.639  | 9.658  | 0.05464 | 0.8 |
| 1i | 29 | -29.8230 | 6.696  | 9.565  | 0.05374 | 0.7 |
| 1i | 30 | -29.5485 | 2.319  | 3.009  | 0.04814 | 0.7 |
| 2a | 1  | -35.0147 | 0.000  | 0.000  | 1.00000 | 7.5 |
| 2a | 2  | -34.9232 | 3.960  | 6.727  | 0.96397 | 7.2 |
| 2a | 3  | -34.8400 | 4.526  | 7.633  | 0.93235 | 7.0 |
| 2a | 4  | -34.7318 | 1.205  | 1.706  | 0.89279 | 6.7 |
| 2a | 5  | -34.4822 | 4.172  | 6.459  | 0.80777 | 6.1 |
| 2a | 6  | -34.0579 | 2.389  | 4.858  | 0.68141 | 5.1 |
| 2a | 7  | -33.9622 | 2.877  | 5.861  | 0.65577 | 4.9 |
| 2a | 8  | -33.8874 | 2.217  | 5.714  | 0.63637 | 4.8 |
| 2a | 9  | -33.6586 | 2.813  | 5.205  | 0.58060 | 4.4 |
| 2a | 10 | -33.3632 | 12.687 | 14.323 | 0.51576 | 3.9 |
| 2a | 11 | -33.0886 | 2.127  | 3.253  | 0.46200 | 3.5 |
| 2a | 12 | -32.9805 | 2.208  | 4.656  | 0.44240 | 3.3 |
| 2a | 13 | -32.7226 | 12.651 | 13.870 | 0.39894 | 3.0 |
| 2a | 14 | -32.6810 | 3.063  | 7.017  | 0.39234 | 2.9 |
| 2a | 15 | -32.6310 | 4.572  | 7.215  | 0.38457 | 2.9 |
| 2a | 16 | -32.5853 | 2.008  | 4.948  | 0.37758 | 2.8 |
| 2a | 17 | -32.3814 | 4.338  | 6.326  | 0.34795 | 2.6 |
| 2a | 18 | -32.3814 | 2.498  | 5.089  | 0.34795 | 2.6 |
| 2a | 19 | -32.2816 | 3.170  | 5.544  | 0.33430 | 2.5 |
| 2a | 20 | -31.8323 | 3.970  | 6.578  | 0.27919 | 2.1 |
| 2a | 21 | -31.7782 | 3.303  | 6.775  | 0.27321 | 2.1 |
| 2a | 22 | -31.4954 | 2.086  | 4.225  | 0.24391 | 1.8 |
| 2a | 23 | -31.4704 | 4.074  | 6.888  | 0.24149 | 1.8 |
| 2a | 24 | -31.0378 | 2.148  | 3.404  | 0.20303 | 1.5 |
| 2a | 25 | -30.9587 | 3.812  | 6.046  | 0.19670 | 1.5 |
| 2a | 26 | -30.7382 | 5.456  | 7.901  | 0.18006 | 1.4 |

|    |    |          |        |        |         |      |
|----|----|----------|--------|--------|---------|------|
| 2a | 27 | -30.6509 | 3.328  | 5.491  | 0.17386 | 1.3  |
| 2a | 28 | -30.4595 | 6.341  | 9.523  | 0.16102 | 1.2  |
| 2a | 29 | -29.8730 | 4.235  | 7.095  | 0.12728 | 1.0  |
| 2a | 30 | -28.8829 | 9.859  | 12.360 | 0.08558 | 0.6  |
| 2b | 1  | -39.8528 | 0.000  | 0.000  | 1.00000 | 10.5 |
| 2b | 2  | -39.7571 | 2.795  | 7.053  | 0.96237 | 10.1 |
| 2b | 3  | -39.0166 | 13.861 | 16.595 | 0.71518 | 7.5  |
| 2b | 4  | -38.5923 | 13.680 | 16.059 | 0.60330 | 6.3  |
| 2b | 5  | -38.4717 | 5.441  | 9.655  | 0.57482 | 6.0  |
| 2b | 6  | -38.3344 | 3.209  | 7.899  | 0.54404 | 5.7  |
| 2b | 7  | -38.1347 | 2.025  | 4.309  | 0.50218 | 5.3  |
| 2b | 8  | -37.5981 | 4.882  | 7.931  | 0.40497 | 4.2  |
| 2b | 9  | -37.3984 | 6.457  | 9.259  | 0.37382 | 3.9  |
| 2b | 10 | -37.2861 | 3.234  | 7.449  | 0.35736 | 3.7  |
| 2b | 11 | -36.9741 | 4.926  | 9.730  | 0.31534 | 3.3  |
| 2b | 12 | -36.9075 | 3.830  | 7.879  | 0.30704 | 3.2  |
| 2b | 13 | -36.7245 | 5.438  | 8.458  | 0.28531 | 3.0  |
| 2b | 14 | -36.4125 | 11.886 | 15.071 | 0.25177 | 2.6  |
| 2b | 15 | -36.0339 | 5.085  | 8.434  | 0.21632 | 2.3  |
| 2b | 16 | -36.0339 | 10.226 | 14.041 | 0.21632 | 2.3  |
| 2b | 17 | -35.9674 | 10.339 | 14.107 | 0.21062 | 2.2  |
| 2b | 18 | -35.3267 | 5.568  | 9.086  | 0.16291 | 1.7  |
| 2b | 19 | -35.3101 | 5.277  | 7.306  | 0.16183 | 1.7  |
| 2b | 20 | -35.2394 | 5.789  | 8.610  | 0.15731 | 1.6  |
| 2b | 21 | -35.1146 | 10.290 | 14.199 | 0.14963 | 1.6  |
| 2b | 22 | -35.0314 | 5.068  | 9.277  | 0.14472 | 1.5  |
| 2b | 23 | -34.9357 | 8.266  | 12.233 | 0.13927 | 1.5  |
| 2b | 24 | -34.9232 | 4.986  | 8.881  | 0.13858 | 1.4  |
| 2b | 25 | -34.7194 | 12.872 | 15.486 | 0.12770 | 1.3  |
| 2b | 26 | -34.5821 | 6.581  | 9.058  | 0.12087 | 1.3  |
| 2b | 27 | -34.5280 | 5.132  | 9.257  | 0.11827 | 1.2  |
| 2b | 28 | -34.1994 | 5.263  | 7.960  | 0.10367 | 1.1  |
| 2b | 29 | -34.0870 | 11.612 | 14.807 | 0.09911 | 1.0  |
| 2b | 30 | -34.0704 | 5.625  | 7.728  | 0.09845 | 1.0  |
| 2c | 1  | -40.1814 | 0.000  | 0.000  | 1.00000 | 18.0 |
| 2c | 2  | -40.1398 | 0.056  | 3.126  | 0.98346 | 17.7 |
| 2c | 3  | -38.9085 | 1.920  | 4.140  | 0.60029 | 10.8 |
| 2c | 4  | -38.9043 | 1.927  | 5.192  | 0.59929 | 10.8 |
| 2c | 5  | -37.3360 | 2.440  | 4.817  | 0.31958 | 5.7  |
| 2c | 6  | -37.3277 | 2.435  | 5.405  | 0.31851 | 5.7  |
| 2c | 7  | -35.8717 | 2.784  | 5.305  | 0.17767 | 3.2  |
| 2c | 8  | -35.8301 | 2.278  | 5.159  | 0.17473 | 3.1  |
| 2c | 9  | -35.8176 | 2.780  | 4.977  | 0.17386 | 3.1  |
| 2c | 10 | -35.8093 | 2.283  | 4.515  | 0.17328 | 3.1  |
| 2c | 11 | -34.7859 | 3.058  | 6.907  | 0.11497 | 2.1  |
| 2c | 12 | -33.8915 | 3.010  | 6.594  | 0.08032 | 1.4  |
| 2c | 13 | -33.6253 | 3.165  | 6.521  | 0.07219 | 1.3  |
| 2c | 14 | -33.5712 | 3.206  | 5.762  | 0.07064 | 1.3  |
| 2c | 15 | -33.5254 | 3.163  | 6.792  | 0.06936 | 1.2  |
| 2c | 16 | -33.3549 | 14.178 | 17.157 | 0.06478 | 1.2  |

|    |    |          |        |        |         |      |
|----|----|----------|--------|--------|---------|------|
| 2c | 17 | -33.2509 | 14.152 | 16.969 | 0.06213 | 1.1  |
| 2c | 18 | -33.2301 | 3.207  | 6.076  | 0.06161 | 1.1  |
| 2c | 19 | -33.1635 | 4.558  | 6.767  | 0.05999 | 1.1  |
| 2c | 20 | -33.1344 | 4.551  | 7.210  | 0.05930 | 1.1  |
| 2c | 21 | -32.4189 | 2.724  | 7.009  | 0.04451 | 0.8  |
| 2c | 22 | -32.2816 | 1.980  | 2.278  | 0.04213 | 0.8  |
| 2c | 23 | -31.5786 | 17.999 | 21.992 | 0.03178 | 0.6  |
| 2c | 24 | -31.5078 | 4.782  | 7.426  | 0.03089 | 0.6  |
| 2c | 25 | -31.4995 | 2.591  | 5.858  | 0.03079 | 0.6  |
| 2c | 26 | -31.4662 | 2.536  | 5.159  | 0.03038 | 0.5  |
| 2c | 27 | -31.4538 | 17.933 | 22.138 | 0.03023 | 0.5  |
| 2c | 28 | -31.3914 | 2.547  | 5.558  | 0.02948 | 0.5  |
| 2c | 29 | -31.3581 | 2.617  | 5.119  | 0.02909 | 0.5  |
| 2c | 30 | -31.1002 | 3.087  | 5.641  | 0.02623 | 0.5  |
| 2d | 1  | -46.0595 | 0.000  | 0.000  | 1.00000 | 26.4 |
| 2d | 2  | -46.0346 | 0.058  | 2.939  | 0.99004 | 26.1 |
| 2d | 3  | -44.4371 | 1.773  | 3.921  | 0.52182 | 13.8 |
| 2d | 4  | -44.1626 | 1.771  | 4.840  | 0.46743 | 12.3 |
| 2d | 5  | -40.5184 | 2.270  | 4.363  | 0.10845 | 2.9  |
| 2d | 6  | -39.6406 | 5.327  | 9.681  | 0.07628 | 2.0  |
| 2d | 7  | -39.6074 | 5.345  | 9.925  | 0.07527 | 2.0  |
| 2d | 8  | -38.7712 | 3.620  | 6.299  | 0.05383 | 1.4  |
| 2d | 9  | -38.6838 | 3.627  | 6.223  | 0.05198 | 1.4  |
| 2d | 10 | -38.6173 | 3.810  | 9.471  | 0.05061 | 1.3  |
| 2d | 11 | -38.4134 | 3.806  | 9.050  | 0.04664 | 1.2  |
| 2d | 12 | -38.1555 | 3.443  | 6.551  | 0.04206 | 1.1  |
| 2d | 13 | -37.9850 | 3.435  | 6.470  | 0.03928 | 1.0  |
| 2d | 14 | -37.2653 | 5.335  | 9.978  | 0.02943 | 0.8  |
| 2d | 15 | -37.2445 | 5.302  | 9.713  | 0.02919 | 0.8  |
| 2d | 16 | -36.8534 | 5.276  | 9.070  | 0.02495 | 0.7  |
| 2d | 17 | -36.6995 | 5.282  | 9.113  | 0.02346 | 0.6  |
| 2d | 18 | -36.6995 | 3.808  | 9.019  | 0.02346 | 0.6  |
| 2d | 19 | -35.9507 | 4.849  | 9.207  | 0.01738 | 0.5  |
| 2d | 20 | -35.5347 | 4.836  | 8.865  | 0.01471 | 0.4  |
| 2d | 21 | -35.2061 | 4.135  | 7.666  | 0.01289 | 0.3  |
| 2d | 22 | -35.0938 | 4.125  | 7.714  | 0.01232 | 0.3  |
| 2d | 23 | -34.9690 | 1.624  | 2.344  | 0.01172 | 0.3  |
| 2d | 24 | -34.9232 | 5.071  | 8.810  | 0.01151 | 0.3  |
| 2d | 25 | -34.8358 | 3.789  | 6.580  | 0.01111 | 0.3  |
| 2d | 26 | -34.6486 | 5.162  | 9.019  | 0.01031 | 0.3  |
| 2d | 27 | -34.6154 | 3.984  | 6.341  | 0.01017 | 0.3  |
| 2d | 28 | -34.3075 | 4.647  | 8.552  | 0.00899 | 0.2  |
| 2d | 29 | -34.2118 | 3.975  | 6.206  | 0.00865 | 0.2  |
| 2d | 30 | -33.9456 | 3.954  | 6.892  | 0.00778 | 0.2  |
| 2e | 1  | -40.9094 | 0.000  | 0.000  | 1.00000 | 12.9 |
| 2e | 2  | -39.4618 | 4.580  | 7.552  | 0.55968 | 7.2  |
| 2e | 3  | -39.2621 | 4.354  | 7.621  | 0.51662 | 6.7  |
| 2e | 4  | -39.2330 | 1.923  | 4.095  | 0.51063 | 6.6  |
| 2e | 5  | -39.1498 | 3.857  | 6.732  | 0.49388 | 6.4  |
| 2e | 6  | -39.0416 | 8.472  | 13.900 | 0.47292 | 6.1  |

|    |    |          |        |        |         |     |
|----|----|----------|--------|--------|---------|-----|
| 2e | 7  | -38.6838 | 6.853  | 9.741  | 0.40973 | 5.3 |
| 2e | 8  | -38.3011 | 8.587  | 14.278 | 0.35145 | 4.6 |
| 2e | 9  | -38.1722 | 2.465  | 4.033  | 0.33374 | 4.3 |
| 2e | 10 | -37.9933 | 3.165  | 5.764  | 0.31064 | 4.0 |
| 2e | 11 | -37.6522 | 3.242  | 7.777  | 0.27094 | 3.5 |
| 2e | 12 | -37.5565 | 9.935  | 14.458 | 0.26074 | 3.4 |
| 2e | 13 | -37.2195 | 3.674  | 8.598  | 0.22779 | 2.9 |
| 2e | 14 | -37.1696 | 6.820  | 9.201  | 0.22328 | 2.9 |
| 2e | 15 | -37.1613 | 3.929  | 8.428  | 0.22254 | 2.9 |
| 2e | 16 | -36.9990 | 3.565  | 8.192  | 0.20852 | 2.7 |
| 2e | 17 | -36.8160 | 2.548  | 3.811  | 0.19377 | 2.5 |
| 2e | 18 | -36.4998 | 3.601  | 8.055  | 0.17070 | 2.2 |
| 2e | 19 | -35.6262 | 3.028  | 7.455  | 0.12026 | 1.6 |
| 2e | 20 | -35.4682 | 6.835  | 9.588  | 0.11288 | 1.5 |
| 2e | 21 | -35.3974 | 9.609  | 14.221 | 0.10972 | 1.4 |
| 2e | 22 | -35.2394 | 3.972  | 8.157  | 0.10298 | 1.3 |
| 2e | 23 | -35.1853 | 3.316  | 8.256  | 0.10078 | 1.3 |
| 2e | 24 | -34.9731 | 14.405 | 19.433 | 0.09256 | 1.2 |
| 2e | 25 | -34.2992 | 14.259 | 19.160 | 0.07064 | 0.9 |
| 2e | 26 | -33.9414 | 3.514  | 8.515  | 0.06121 | 0.8 |
| 2e | 27 | -33.7584 | 6.639  | 9.168  | 0.05687 | 0.7 |
| 2e | 28 | -33.7501 | 4.328  | 7.607  | 0.05669 | 0.7 |
| 2e | 29 | -33.6502 | 3.552  | 9.003  | 0.05446 | 0.7 |
| 2e | 30 | -33.2966 | 4.500  | 6.924  | 0.04726 | 0.6 |
| 2f | 1  | -33.4339 | 0.000  | 0.000  | 1.00000 | 8.4 |
| 2f | 2  | -33.0678 | 2.437  | 4.628  | 0.86350 | 7.2 |
| 2f | 3  | -32.8931 | 4.800  | 7.878  | 0.80508 | 6.7 |
| 2f | 4  | -32.4896 | 3.793  | 6.580  | 0.68483 | 5.7 |
| 2f | 5  | -32.3440 | 3.678  | 6.271  | 0.64600 | 5.4 |
| 2f | 6  | -32.3357 | 2.267  | 4.782  | 0.64385 | 5.4 |
| 2f | 7  | -32.1194 | 4.404  | 6.712  | 0.59036 | 4.9 |
| 2f | 8  | -31.8240 | 3.243  | 6.314  | 0.52444 | 4.4 |
| 2f | 9  | -31.8032 | 5.429  | 8.273  | 0.52008 | 4.4 |
| 2f | 10 | -31.5786 | 3.317  | 5.577  | 0.47529 | 4.0 |
| 2f | 11 | -31.2000 | 10.165 | 11.268 | 0.40836 | 3.4 |
| 2f | 12 | -31.1834 | 4.373  | 6.459  | 0.40565 | 3.4 |
| 2f | 13 | -31.0336 | 1.571  | 2.421  | 0.38201 | 3.2 |
| 2f | 14 | -31.0170 | 10.393 | 11.390 | 0.37947 | 3.2 |
| 2f | 15 | -30.7590 | 4.094  | 6.320  | 0.34219 | 2.9 |
| 2f | 16 | -30.5011 | 2.963  | 4.792  | 0.30858 | 2.6 |
| 2f | 17 | -30.4678 | 3.041  | 4.931  | 0.30449 | 2.6 |
| 2f | 18 | -30.3181 | 2.593  | 4.669  | 0.28674 | 2.4 |
| 2f | 19 | -30.1891 | 2.843  | 4.268  | 0.27230 | 2.3 |
| 2f | 20 | -30.0768 | 4.397  | 6.404  | 0.26031 | 2.2 |
| 2f | 21 | -30.0518 | 4.747  | 6.498  | 0.25771 | 2.2 |
| 2f | 22 | -29.7482 | 4.808  | 7.567  | 0.22817 | 1.9 |
| 2f | 23 | -29.5069 | 4.546  | 7.107  | 0.20714 | 1.7 |
| 2f | 24 | -29.4029 | 3.862  | 6.243  | 0.19868 | 1.7 |
| 2f | 25 | -29.1866 | 5.576  | 8.711  | 0.18217 | 1.5 |
| 2f | 26 | -29.0410 | 2.377  | 3.367  | 0.17184 | 1.4 |



|    |    |          |        |        |         |      |
|----|----|----------|--------|--------|---------|------|
| 2f | 27 | -28.8995 | 3.189  | 5.781  | 0.16237 | 1.4  |
| 2f | 28 | -28.6998 | 6.278  | 9.534  | 0.14988 | 1.3  |
| 2f | 29 | -28.5750 | 6.530  | 9.114  | 0.14256 | 1.2  |
| 2f | 30 | -28.3920 | 4.679  | 7.425  | 0.13248 | 1.1  |
| 3a | 1  | -41.7830 | 0.000  | 0.000  | 1.00000 | 10.4 |
| 3a | 2  | -41.1923 | 4.096  | 7.283  | 0.78913 | 8.2  |
| 3a | 3  | -40.8304 | 2.197  | 4.464  | 0.68255 | 7.1  |
| 3a | 4  | -40.5059 | 3.378  | 5.573  | 0.59929 | 6.3  |
| 3a | 5  | -40.4144 | 4.734  | 8.285  | 0.57770 | 6.0  |
| 3a | 6  | -40.3062 | 2.260  | 4.680  | 0.55319 | 5.8  |
| 3a | 7  | -40.2605 | 2.656  | 5.001  | 0.54313 | 5.7  |
| 3a | 8  | -39.9984 | 2.756  | 8.780  | 0.48896 | 5.1  |
| 3a | 9  | -39.6240 | 2.598  | 3.799  | 0.42081 | 4.4  |
| 3a | 10 | -39.4243 | 1.972  | 4.508  | 0.38844 | 4.1  |
| 3a | 11 | -39.4035 | 3.428  | 8.424  | 0.38521 | 4.0  |
| 3a | 12 | -39.0582 | 5.516  | 9.624  | 0.33541 | 3.5  |
| 3a | 13 | -38.8045 | 2.358  | 5.217  | 0.30297 | 3.2  |
| 3a | 14 | -38.6672 | 3.693  | 7.207  | 0.28674 | 3.0  |
| 3a | 15 | -38.4634 | 3.499  | 5.890  | 0.26424 | 2.8  |
| 3a | 16 | -38.4301 | 5.915  | 11.135 | 0.26074 | 2.7  |
| 3a | 17 | -38.1347 | 2.864  | 9.189  | 0.23162 | 2.4  |
| 3a | 18 | -37.9392 | 2.474  | 3.692  | 0.21416 | 2.2  |
| 3a | 19 | -37.8768 | 3.730  | 7.898  | 0.20887 | 2.2  |
| 3a | 20 | -37.6022 | 4.213  | 9.359  | 0.18710 | 2.0  |
| 3a | 21 | -37.3984 | 2.689  | 4.160  | 0.17242 | 1.8  |
| 3a | 22 | -36.8826 | 2.393  | 5.050  | 0.14021 | 1.5  |
| 3a | 23 | -36.2794 | 3.175  | 5.432  | 0.11009 | 1.2  |
| 3a | 24 | -36.2586 | 2.768  | 8.220  | 0.10917 | 1.1  |
| 3a | 25 | -35.2810 | 10.504 | 14.624 | 0.07378 | 0.8  |
| 3a | 26 | -34.7526 | 3.722  | 5.647  | 0.05969 | 0.6  |
| 3a | 27 | -34.3990 | 3.803  | 6.467  | 0.05180 | 0.5  |
| 3a | 28 | -34.2826 | 4.850  | 8.884  | 0.04944 | 0.5  |
| 3a | 29 | -34.1744 | 4.606  | 6.726  | 0.04734 | 0.5  |
| 3a | 30 | -33.5421 | 6.788  | 10.123 | 0.03674 | 0.4  |
| 3b | 1  | -45.2733 | 0.000  | 0.000  | 1.00000 | 23.0 |
| 3b | 2  | -42.9312 | 2.803  | 3.334  | 0.39103 | 9.0  |
| 3b | 3  | -42.8938 | 2.793  | 8.141  | 0.38521 | 8.9  |
| 3b | 4  | -42.5027 | 3.040  | 4.482  | 0.32932 | 7.6  |
| 3b | 5  | -42.3197 | 2.995  | 8.069  | 0.30601 | 7.0  |
| 3b | 6  | -41.5958 | 3.023  | 7.836  | 0.22894 | 5.3  |
| 3b | 7  | -40.7763 | 3.480  | 9.279  | 0.16483 | 3.8  |
| 3b | 8  | -40.5309 | 6.634  | 10.429 | 0.14938 | 3.4  |
| 3b | 9  | -40.0982 | 2.408  | 6.535  | 0.12559 | 2.9  |
| 3b | 10 | -40.0442 | 2.940  | 8.235  | 0.12290 | 2.8  |
| 3b | 11 | -39.9859 | 3.546  | 6.743  | 0.12006 | 2.8  |
| 3b | 12 | -39.4576 | 2.165  | 6.271  | 0.09714 | 2.2  |
| 3b | 13 | -39.3370 | 3.321  | 9.047  | 0.09256 | 2.1  |
| 3b | 14 | -39.3370 | 2.844  | 8.606  | 0.09256 | 2.1  |
| 3b | 15 | -38.9376 | 3.223  | 6.771  | 0.07886 | 1.8  |
| 3b | 16 | -38.8960 | 5.385  | 8.676  | 0.07756 | 1.8  |

|           |    |          |        |        |         |      |
|-----------|----|----------|--------|--------|---------|------|
| <b>3b</b> | 17 | -38.6630 | 4.021  | 8.903  | 0.07064 | 1.6  |
| <b>3b</b> | 18 | -38.4176 | 2.623  | 6.046  | 0.06402 | 1.5  |
| <b>3b</b> | 19 | -38.3843 | 3.659  | 7.212  | 0.06318 | 1.5  |
| <b>3b</b> | 20 | -38.2970 | 3.901  | 9.708  | 0.06100 | 1.4  |
| <b>3b</b> | 21 | -37.7603 | 4.559  | 8.113  | 0.04919 | 1.1  |
| <b>3b</b> | 22 | -37.7395 | 2.628  | 5.608  | 0.04878 | 1.1  |
| <b>3b</b> | 23 | -37.1363 | 3.184  | 7.306  | 0.03831 | 0.9  |
| <b>3b</b> | 24 | -37.0198 | 8.619  | 12.963 | 0.03656 | 0.8  |
| <b>3b</b> | 25 | -36.6163 | 5.235  | 8.988  | 0.03110 | 0.7  |
| <b>3b</b> | 26 | -36.5622 | 5.488  | 9.255  | 0.03043 | 0.7  |
| <b>3b</b> | 27 | -36.0714 | 3.453  | 6.116  | 0.02499 | 0.6  |
| <b>3b</b> | 28 | -35.5597 | 5.042  | 8.475  | 0.02036 | 0.5  |
| <b>3b</b> | 29 | -35.5430 | 3.483  | 9.159  | 0.02022 | 0.5  |
| <b>3b</b> | 30 | -35.5222 | 12.279 | 15.416 | 0.02006 | 0.5  |
| <b>3c</b> | 1  | -39.3578 | 0.000  | 0.000  | 1.00000 | 12.7 |
| <b>3c</b> | 2  | -39.3411 | 0.057  | 4.702  | 0.99335 | 12.6 |
| <b>3c</b> | 3  | -39.3037 | 0.059  | 5.598  | 0.97855 | 12.4 |
| <b>3c</b> | 4  | -39.1706 | 0.084  | 3.038  | 0.92770 | 11.8 |
| <b>3c</b> | 5  | -37.3360 | 2.558  | 4.885  | 0.44462 | 5.7  |
| <b>3c</b> | 6  | -37.3152 | 2.551  | 5.448  | 0.44093 | 5.6  |
| <b>3c</b> | 7  | -37.3110 | 2.540  | 4.957  | 0.44019 | 5.6  |
| <b>3c</b> | 8  | -37.2819 | 2.550  | 5.514  | 0.43508 | 5.5  |
| <b>3c</b> | 9  | -35.7261 | 3.092  | 8.119  | 0.23317 | 3.0  |
| <b>3c</b> | 10 | -35.6720 | 3.057  | 7.358  | 0.22817 | 2.9  |
| <b>3c</b> | 11 | -35.6054 | 3.058  | 6.878  | 0.22217 | 2.8  |
| <b>3c</b> | 12 | -34.9190 | 2.807  | 4.925  | 0.16872 | 2.1  |
| <b>3c</b> | 13 | -34.8234 | 2.805  | 6.109  | 0.16237 | 2.1  |
| <b>3c</b> | 14 | -34.7984 | 2.818  | 5.807  | 0.16075 | 2.0  |
| <b>3c</b> | 15 | -34.4323 | 2.818  | 5.323  | 0.13881 | 1.8  |
| <b>3c</b> | 16 | -34.3866 | 3.029  | 8.499  | 0.13629 | 1.7  |
| <b>3c</b> | 17 | -33.4797 | 2.607  | 5.176  | 0.09474 | 1.2  |
| <b>3c</b> | 18 | -33.0803 | 2.507  | 5.687  | 0.08073 | 1.0  |
| <b>3c</b> | 19 | -32.7475 | 12.016 | 15.688 | 0.07064 | 0.9  |
| <b>3c</b> | 20 | -32.5354 | 11.969 | 15.538 | 0.06488 | 0.8  |
| <b>3c</b> | 21 | -31.9904 | 4.980  | 7.169  | 0.05215 | 0.7  |
| <b>3c</b> | 22 | -31.7741 | 2.094  | 5.111  | 0.04782 | 0.6  |
| <b>3c</b> | 23 | -31.6368 | 24.173 | 27.331 | 0.04526 | 0.6  |
| <b>3c</b> | 24 | -31.6285 | 24.195 | 27.287 | 0.04511 | 0.6  |
| <b>3c</b> | 25 | -31.6035 | 24.196 | 27.154 | 0.04466 | 0.6  |
| <b>3c</b> | 26 | -31.5370 | 24.183 | 27.100 | 0.04348 | 0.6  |
| <b>3c</b> | 27 | -31.4454 | 26.206 | 28.929 | 0.04192 | 0.5  |
| <b>3c</b> | 28 | -31.4288 | 17.614 | 21.976 | 0.04164 | 0.5  |
| <b>3c</b> | 29 | -31.3830 | 17.597 | 21.846 | 0.04088 | 0.5  |
| <b>3c</b> | 30 | -31.3206 | 4.105  | 7.935  | 0.03987 | 0.5  |
| <b>3d</b> | 1  | -46.6170 | 0.000  | 0.000  | 1.00000 | 48.5 |
| <b>3d</b> | 2  | -44.5494 | 1.747  | 3.838  | 0.43654 | 21.2 |
| <b>3d</b> | 3  | -39.9901 | 4.775  | 9.639  | 0.07017 | 3.4  |
| <b>3d</b> | 4  | -39.1498 | 3.475  | 6.089  | 0.05010 | 2.4  |
| <b>3d</b> | 5  | -38.9293 | 3.640  | 6.381  | 0.04587 | 2.2  |
| <b>3d</b> | 6  | -38.7462 | 3.477  | 9.472  | 0.04262 | 2.1  |

|    |    |          |        |        |         |      |
|----|----|----------|--------|--------|---------|------|
| 3d | 7  | -38.2595 | 3.360  | 6.311  | 0.03506 | 1.7  |
| 3d | 8  | -38.0848 | 3.610  | 6.639  | 0.03269 | 1.6  |
| 3d | 9  | -38.0307 | 4.733  | 9.703  | 0.03199 | 1.6  |
| 3d | 10 | -37.9891 | 3.920  | 6.277  | 0.03146 | 1.5  |
| 3d | 11 | -37.5648 | 3.467  | 9.381  | 0.02654 | 1.3  |
| 3d | 12 | -37.4982 | 3.190  | 9.886  | 0.02584 | 1.3  |
| 3d | 13 | -37.3526 | 3.726  | 6.478  | 0.02438 | 1.2  |
| 3d | 14 | -37.2486 | 3.720  | 6.010  | 0.02338 | 1.1  |
| 3d | 15 | -37.1488 | 4.369  | 9.108  | 0.02246 | 1.1  |
| 3d | 16 | -37.0198 | 3.620  | 6.324  | 0.02133 | 1.0  |
| 3d | 17 | -36.3210 | 4.198  | 6.930  | 0.01612 | 0.8  |
| 3d | 18 | -36.2128 | 4.058  | 7.491  | 0.01544 | 0.7  |
| 3d | 19 | -35.8550 | 4.360  | 7.712  | 0.01337 | 0.6  |
| 3d | 20 | -35.6179 | 4.472  | 6.267  | 0.01216 | 0.6  |
| 3d | 21 | -35.4390 | 4.877  | 8.888  | 0.01132 | 0.5  |
| 3d | 22 | -35.1936 | 10.460 | 14.212 | 0.01026 | 0.5  |
| 3d | 23 | -35.1437 | 4.907  | 8.654  | 0.01005 | 0.5  |
| 3d | 24 | -35.0314 | 3.817  | 5.943  | 0.00961 | 0.5  |
| 3d | 25 | -34.7194 | 4.093  | 6.968  | 0.00848 | 0.4  |
| 3d | 26 | -34.6778 | 4.686  | 7.889  | 0.00834 | 0.4  |
| 3d | 27 | -34.3616 | 4.367  | 7.419  | 0.00735 | 0.4  |
| 3d | 28 | -34.2950 | 4.529  | 6.784  | 0.00715 | 0.3  |
| 3d | 29 | -34.1827 | 4.926  | 10.039 | 0.00684 | 0.3  |
| 3d | 30 | -33.9040 | 4.523  | 7.571  | 0.00612 | 0.3  |
| 4c | 1  | -42.4986 | 0.000  | 0.000  | 1.00000 | 20.6 |
| 4c | 2  | -42.4819 | 0.031  | 3.126  | 0.99335 | 20.5 |
| 4c | 3  | -42.4778 | 0.057  | 4.207  | 0.99170 | 20.5 |
| 4c | 4  | -42.4778 | 0.010  | 5.241  | 0.99170 | 20.5 |
| 4c | 5  | -37.6147 | 1.180  | 1.238  | 0.14114 | 2.9  |
| 4c | 6  | -35.3226 | 2.801  | 5.459  | 0.05631 | 1.2  |
| 4c | 7  | -35.3018 | 2.830  | 5.145  | 0.05584 | 1.2  |
| 4c | 8  | -35.2726 | 2.809  | 5.111  | 0.05519 | 1.1  |
| 4c | 9  | -35.1562 | 2.670  | 4.752  | 0.05267 | 1.1  |
| 4c | 10 | -35.1104 | 2.796  | 4.771  | 0.05172 | 1.1  |
| 4c | 11 | -34.9274 | 2.595  | 5.357  | 0.04806 | 1.0  |
| 4c | 12 | -34.5571 | 1.813  | 3.622  | 0.04143 | 0.9  |
| 4c | 13 | -34.2742 | 2.593  | 4.726  | 0.03699 | 0.8  |
| 4c | 14 | -34.2202 | 2.602  | 4.762  | 0.03619 | 0.7  |
| 4c | 15 | -34.2202 | 2.596  | 5.356  | 0.03619 | 0.7  |
| 4c | 16 | -34.2160 | 2.600  | 5.390  | 0.03613 | 0.7  |
| 4c | 17 | -34.0496 | 1.978  | 5.480  | 0.03380 | 0.7  |
| 4c | 18 | -33.9622 | 2.723  | 5.347  | 0.03264 | 0.7  |
| 4c | 19 | -33.8624 | 2.077  | 4.647  | 0.03136 | 0.6  |
| 4c | 20 | -32.3107 | 4.120  | 6.818  | 0.01683 | 0.3  |
| 4c | 21 | -32.2816 | 4.117  | 7.479  | 0.01664 | 0.3  |
| 4c | 22 | -31.6368 | 2.417  | 5.109  | 0.01285 | 0.3  |
| 4c | 23 | -31.6160 | 2.434  | 3.203  | 0.01274 | 0.3  |
| 4c | 24 | -31.4538 | 17.576 | 22.024 | 0.01194 | 0.2  |
| 4c | 25 | -31.3747 | 17.578 | 21.899 | 0.01157 | 0.2  |
| 4c | 26 | -31.3539 | 17.587 | 21.586 | 0.01147 | 0.2  |

|           |    |          |        |        |         |     |
|-----------|----|----------|--------|--------|---------|-----|
| <b>4c</b> | 27 | -31.3539 | 17.627 | 21.733 | 0.01147 | 0.2 |
| <b>4c</b> | 28 | -29.9853 | 2.774  | 5.731  | 0.00663 | 0.1 |
| <b>4c</b> | 29 | -29.7315 | 2.784  | 7.279  | 0.00599 | 0.1 |
| <b>4c</b> | 30 | -29.6026 | 2.857  | 6.312  | 0.00568 | 0.1 |

**Table S3.** Population of each binding mode for each complex PRTb-BODIPY derivative.

| <b>Ligand</b> | <b>Mode</b> | <b>Affinity_ kcal.mol<sup>-1</sup></b> | <b>rmsd_L</b> | <b>rmsd_U</b> | <b>Z</b> | <b>%Pop</b> |
|---------------|-------------|----------------------------------------|---------------|---------------|----------|-------------|
| <b>1a</b>     | 1           | -39.4243                               | 0.0000        | 0.0000        | 1.00000  | 19.3        |
| <b>1a</b>     | 2           | -39.3827                               | 0.0410        | 3.9160        | 0.98346  | 19.0        |
| <b>1a</b>     | 3           | -36.8534                               | 2.2090        | 6.3930        | 0.35676  | 6.9         |
| <b>1a</b>     | 4           | -36.8035                               | 2.0330        | 4.6690        | 0.34969  | 6.7         |
| <b>1a</b>     | 5           | -36.7910                               | 2.2030        | 5.2120        | 0.34795  | 6.7         |
| <b>1a</b>     | 6           | -36.7702                               | 2.0230        | 3.3950        | 0.34506  | 6.7         |
| <b>1a</b>     | 7           | -36.0256                               | 2.4040        | 5.0130        | 0.25600  | 4.9         |
| <b>1a</b>     | 8           | -36.0006                               | 2.1160        | 4.9740        | 0.25345  | 4.9         |
| <b>1a</b>     | 9           | -35.9216                               | 2.1140        | 5.9530        | 0.24555  | 4.7         |
| <b>1a</b>     | 10          | -34.3034                               | 1.9980        | 5.2550        | 0.12835  | 2.5         |
| <b>1a</b>     | 11          | -34.2534                               | 1.9420        | 5.7640        | 0.12580  | 2.4         |
| <b>1a</b>     | 12          | -32.9971                               | 3.2730        | 5.5610        | 0.07602  | 1.5         |
| <b>1a</b>     | 13          | -32.8640                               | 3.9460        | 6.6230        | 0.07207  | 1.4         |
| <b>1a</b>     | 14          | -32.8432                               | 2.3600        | 3.6670        | 0.07147  | 1.4         |
| <b>1a</b>     | 15          | -32.8349                               | 3.2870        | 6.4150        | 0.07124  | 1.4         |
| <b>1a</b>     | 16          | -32.5978                               | 9.7630        | 12.0410       | 0.06478  | 1.2         |
| <b>1a</b>     | 17          | -32.2234                               | 10.0110       | 11.7930       | 0.05575  | 1.1         |
| <b>1a</b>     | 18          | -31.7949                               | 13.8210       | 16.5440       | 0.04695  | 0.9         |
| <b>1a</b>     | 19          | -31.7824                               | 13.8230       | 16.8150       | 0.04671  | 0.9         |
| <b>1a</b>     | 20          | -31.4746                               | 10.6100       | 12.1440       | 0.04129  | 0.8         |
| <b>1a</b>     | 21          | -31.0128                               | 11.4610       | 12.9690       | 0.03431  | 0.7         |
| <b>1a</b>     | 22          | -30.9379                               | 4.5810        | 8.9580        | 0.03330  | 0.6         |
| <b>1a</b>     | 23          | -30.6301                               | 4.5380        | 7.4180        | 0.02943  | 0.6         |
| <b>1a</b>     | 24          | -30.1850                               | 14.3250       | 17.0850       | 0.02462  | 0.5         |
| <b>1a</b>     | 25          | -30.1808                               | 14.3440       | 17.3690       | 0.02458  | 0.5         |
| <b>1a</b>     | 26          | -29.9437                               | 14.2550       | 17.1950       | 0.02235  | 0.4         |
| <b>1a</b>     | 27          | -29.8022                               | 19.1170       | 22.0970       | 0.02112  | 0.4         |
| <b>1a</b>     | 28          | -29.7773                               | 19.1260       | 21.8350       | 0.02091  | 0.4         |
| <b>1a</b>     | 29          | -29.5277                               | 13.6940       | 16.2580       | 0.01892  | 0.4         |
| <b>1a</b>     | 30          | -29.4861                               | 19.2740       | 22.2820       | 0.01861  | 0.4         |
| <b>1b</b>     | 1           | -44.1626                               | 0.0000        | 0.0000        | 1.00000  | 21.9        |
| <b>1b</b>     | 2           | -43.8422                               | 0.0600        | 3.5610        | 0.87948  | 19.3        |
| <b>1b</b>     | 3           | -42.2947                               | 1.2220        | 2.3500        | 0.47292  | 10.4        |
| <b>1b</b>     | 4           | -41.8080                               | 1.2160        | 4.2410        | 0.38908  | 8.5         |
| <b>1b</b>     | 5           | -40.7597                               | 2.5570        | 6.1780        | 0.25557  | 5.6         |
| <b>1b</b>     | 6           | -40.3645                               | 2.5430        | 6.8980        | 0.21813  | 4.8         |
| <b>1b</b>     | 7           | -39.5990                               | 2.2020        | 4.5030        | 0.16049  | 3.5         |
| <b>1b</b>     | 8           | -39.1456                               | 2.2160        | 3.3070        | 0.13381  | 2.9         |
| <b>1b</b>     | 9           | -38.7837                               | 9.4580        | 12.4180       | 0.11574  | 2.5         |

|           |    |          |         |         |         |      |
|-----------|----|----------|---------|---------|---------|------|
| <b>1b</b> | 10 | -38.7296 | 9.4240  | 12.1010 | 0.11325 | 2.5  |
| <b>1b</b> | 11 | -38.5507 | 3.0260  | 4.4800  | 0.10542 | 2.3  |
| <b>1b</b> | 12 | -38.2678 | 2.2450  | 3.6440  | 0.09411 | 2.1  |
| <b>1b</b> | 13 | -38.1722 | 4.8750  | 9.1700  | 0.09057 | 2.0  |
| <b>1b</b> | 14 | -37.8976 | 4.8520  | 9.7070  | 0.08113 | 1.8  |
| <b>1b</b> | 15 | -36.6621 | 14.3250 | 17.1610 | 0.04944 | 1.1  |
| <b>1b</b> | 16 | -36.5082 | 9.6850  | 12.3230 | 0.04648 | 1.0  |
| <b>1b</b> | 17 | -36.3418 | 14.6960 | 17.1320 | 0.04348 | 1.0  |
| <b>1b</b> | 18 | -36.1504 | 3.4810  | 5.0080  | 0.04027 | 0.9  |
| <b>1b</b> | 19 | -35.3642 | 5.6050  | 10.6110 | 0.02938 | 0.6  |
| <b>1b</b> | 20 | -35.3101 | 5.2940  | 10.9540 | 0.02875 | 0.6  |
| <b>1b</b> | 21 | -35.1936 | 5.4680  | 10.5420 | 0.02744 | 0.6  |
| <b>1b</b> | 22 | -35.0979 | 10.1950 | 12.4370 | 0.02641 | 0.6  |
| <b>1b</b> | 23 | -35.0230 | 14.3460 | 16.6940 | 0.02563 | 0.6  |
| <b>1b</b> | 24 | -34.9482 | 14.3800 | 16.3930 | 0.02487 | 0.5  |
| <b>1b</b> | 25 | -34.7110 | 5.4230  | 8.4160  | 0.02261 | 0.5  |
| <b>1b</b> | 26 | -34.6902 | 5.4450  | 7.8800  | 0.02243 | 0.5  |
| <b>1b</b> | 27 | -34.2243 | 6.2320  | 9.5430  | 0.01861 | 0.4  |
| <b>1b</b> | 28 | -34.1661 | 15.3360 | 17.6680 | 0.01818 | 0.4  |
| <b>1b</b> | 29 | -34.1037 | 5.4140  | 10.2350 | 0.01773 | 0.4  |
| <b>1b</b> | 30 | -33.9498 | 5.5390  | 10.9720 | 0.01667 | 0.4  |
| <b>1c</b> | 1  | -40.7347 | 0.0000  | 0.0000  | 1.00000 | 13.0 |
| <b>1c</b> | 2  | -40.7098 | 0.0450  | 3.3910  | 0.99004 | 12.9 |
| <b>1c</b> | 3  | -40.6848 | 0.0440  | 3.2210  | 0.98019 | 12.8 |
| <b>1c</b> | 4  | -40.6682 | 0.0570  | 4.6770  | 0.97367 | 12.7 |
| <b>1c</b> | 5  | -37.3485 | 2.4440  | 4.8230  | 0.25729 | 3.4  |
| <b>1c</b> | 6  | -37.3485 | 2.4440  | 5.4440  | 0.25729 | 3.4  |
| <b>1c</b> | 7  | -37.2528 | 2.4360  | 5.2640  | 0.24760 | 3.2  |
| <b>1c</b> | 8  | -37.2403 | 2.4340  | 4.6030  | 0.24637 | 3.2  |
| <b>1c</b> | 9  | -36.8784 | 2.7610  | 5.9710  | 0.21309 | 2.8  |
| <b>1c</b> | 10 | -36.8701 | 2.7440  | 6.3170  | 0.21238 | 2.8  |
| <b>1c</b> | 11 | -36.8077 | 2.7540  | 6.6570  | 0.20714 | 2.7  |
| <b>1c</b> | 12 | -36.7453 | 2.7310  | 6.3300  | 0.20202 | 2.6  |
| <b>1c</b> | 13 | -36.1338 | 1.9780  | 4.4140  | 0.15809 | 2.1  |
| <b>1c</b> | 14 | -35.9840 | 21.2140 | 24.4350 | 0.14888 | 1.9  |
| <b>1c</b> | 15 | -35.9382 | 21.1930 | 24.4550 | 0.14618 | 1.9  |
| <b>1c</b> | 16 | -35.8675 | 21.2100 | 24.6370 | 0.14209 | 1.9  |
| <b>1c</b> | 17 | -35.8509 | 21.1950 | 24.5800 | 0.14114 | 1.8  |
| <b>1c</b> | 18 | -35.8010 | 1.9920  | 4.5140  | 0.13835 | 1.8  |
| <b>1c</b> | 19 | -35.0480 | 2.3020  | 5.3530  | 0.10230 | 1.3  |
| <b>1c</b> | 20 | -35.0189 | 2.3290  | 6.0100  | 0.10111 | 1.3  |
| <b>1c</b> | 21 | -34.9357 | 2.2750  | 4.8770  | 0.09780 | 1.3  |
| <b>1c</b> | 22 | -34.6403 | 28.5390 | 31.4440 | 0.08687 | 1.1  |
| <b>1c</b> | 23 | -34.5696 | 28.3890 | 31.2470 | 0.08445 | 1.1  |
| <b>1c</b> | 24 | -34.4406 | 21.6420 | 25.2530 | 0.08019 | 1.0  |
| <b>1c</b> | 25 | -34.4365 | 3.1190  | 6.4090  | 0.08006 | 1.0  |
| <b>1c</b> | 26 | -34.4282 | 21.7640 | 25.2850 | 0.07979 | 1.0  |
| <b>1c</b> | 27 | -34.3491 | 3.1210  | 6.9350  | 0.07730 | 1.0  |
| <b>1c</b> | 28 | -34.3075 | 3.1660  | 6.3860  | 0.07602 | 1.0  |
| <b>1c</b> | 29 | -34.2701 | 2.5440  | 4.8930  | 0.07489 | 1.0  |

|    |    |          |         |         |         |      |
|----|----|----------|---------|---------|---------|------|
| 1c | 30 | -33.8998 | 2.6720  | 5.4120  | 0.06456 | 0.8  |
| 1d | 1  | -42.6109 | 0.0000  | 0.0000  | 1.00000 | 8.6  |
| 1d | 2  | -42.4362 | 0.0950  | 3.1540  | 0.93235 | 8.0  |
| 1d | 3  | -42.3821 | 0.0650  | 2.9590  | 0.91235 | 7.9  |
| 1d | 4  | -42.3696 | 0.1120  | 4.3700  | 0.90780 | 7.8  |
| 1d | 5  | -41.9078 | 3.4280  | 8.9950  | 0.75438 | 6.5  |
| 1d | 6  | -41.6749 | 1.8060  | 4.0020  | 0.68712 | 5.9  |
| 1d | 7  | -41.6125 | 3.4120  | 8.8440  | 0.67014 | 5.8  |
| 1d | 8  | -41.5043 | 3.4220  | 9.3830  | 0.64170 | 5.5  |
| 1d | 9  | -41.0842 | 3.6540  | 8.4860  | 0.54223 | 4.7  |
| 1d | 10 | -39.4368 | 17.8990 | 23.1460 | 0.28013 | 2.4  |
| 1d | 11 | -39.4285 | 3.1580  | 9.2710  | 0.27919 | 2.4  |
| 1d | 12 | -39.3162 | 18.4910 | 24.2800 | 0.26690 | 2.3  |
| 1d | 13 | -39.2870 | 3.1950  | 8.2690  | 0.26380 | 2.3  |
| 1d | 14 | -39.2662 | 18.4760 | 24.1590 | 0.26161 | 2.3  |
| 1d | 15 | -39.2496 | 3.1990  | 8.7730  | 0.25987 | 2.2  |
| 1d | 16 | -39.1789 | 18.4500 | 24.3490 | 0.25261 | 2.2  |
| 1d | 17 | -39.1706 | 3.1890  | 8.8230  | 0.25177 | 2.2  |
| 1d | 18 | -39.1456 | 18.2170 | 23.6150 | 0.24926 | 2.1  |
| 1d | 19 | -39.1414 | 18.2310 | 23.5810 | 0.24884 | 2.1  |
| 1d | 20 | -38.9709 | 17.9480 | 23.1990 | 0.23240 | 2.0  |
| 1d | 21 | -38.6755 | 3.4830  | 8.8010  | 0.20645 | 1.8  |
| 1d | 22 | -38.6464 | 18.2690 | 23.5140 | 0.20405 | 1.8  |
| 1d | 23 | -38.6131 | 18.0040 | 23.2190 | 0.20135 | 1.7  |
| 1d | 24 | -38.5923 | 3.4870  | 8.6290  | 0.19967 | 1.7  |
| 1d | 25 | -38.4925 | 18.2770 | 23.4690 | 0.19184 | 1.7  |
| 1d | 26 | -38.0058 | 18.6100 | 24.3760 | 0.15783 | 1.4  |
| 1d | 27 | -37.9475 | 3.6700  | 8.2810  | 0.15419 | 1.3  |
| 1d | 28 | -37.7062 | 18.6320 | 24.4690 | 0.13997 | 1.2  |
| 1d | 29 | -37.6522 | 18.6730 | 24.5410 | 0.13697 | 1.2  |
| 1d | 30 | -37.2653 | 3.6110  | 8.8420  | 0.11729 | 1.0  |
| 1e | 1  | -47.9814 | 0.0000  | 0.0000  | 1.00000 | 27.1 |
| 1e | 2  | -47.9315 | 0.0980  | 3.3400  | 0.98019 | 26.6 |
| 1e | 3  | -46.3091 | 1.0340  | 2.5010  | 0.51148 | 13.9 |
| 1e | 4  | -45.8224 | 1.0240  | 4.1630  | 0.42081 | 11.4 |
| 1e | 5  | -42.0493 | 4.5120  | 10.7360 | 0.09271 | 2.5  |
| 1e | 6  | -41.7414 | 4.1590  | 7.1340  | 0.08195 | 2.2  |
| 1e | 7  | -41.7290 | 4.1910  | 6.7120  | 0.08154 | 2.2  |
| 1e | 8  | -41.4211 | 3.0780  | 8.1260  | 0.07207 | 2.0  |
| 1e | 9  | -41.3213 | 3.0830  | 8.6160  | 0.06924 | 1.9  |
| 1e | 10 | -40.9427 | 2.0690  | 3.8970  | 0.05949 | 1.6  |
| 1e | 11 | -40.4518 | 2.1170  | 5.1330  | 0.04887 | 1.3  |
| 1e | 12 | -39.3453 | 4.9370  | 10.6980 | 0.03136 | 0.8  |
| 1e | 13 | -38.8586 | 2.8630  | 7.9170  | 0.02580 | 0.7  |
| 1e | 14 | -38.8502 | 3.0900  | 9.1350  | 0.02571 | 0.7  |
| 1e | 15 | -38.8003 | 2.8730  | 8.4130  | 0.02520 | 0.7  |
| 1e | 16 | -38.7462 | 3.1090  | 8.7980  | 0.02466 | 0.7  |
| 1e | 17 | -37.4358 | 9.0380  | 12.6960 | 0.01458 | 0.4  |
| 1e | 18 | -37.4192 | 5.8990  | 9.7380  | 0.01449 | 0.4  |
| 1e | 19 | -37.3069 | 3.1980  | 8.3390  | 0.01385 | 0.4  |

|    |    |          |         |         |         |      |
|----|----|----------|---------|---------|---------|------|
| 1e | 20 | -37.1738 | 3.1900  | 8.7530  | 0.01313 | 0.4  |
| 1e | 21 | -36.8451 | 4.8610  | 8.2720  | 0.01151 | 0.3  |
| 1e | 22 | -36.7494 | 3.3730  | 9.1880  | 0.01108 | 0.3  |
| 1e | 23 | -36.7328 | 4.0260  | 7.6250  | 0.01100 | 0.3  |
| 1e | 24 | -36.2336 | 5.7960  | 8.4260  | 0.00901 | 0.2  |
| 1e | 25 | -36.2045 | 9.0220  | 12.7300 | 0.00890 | 0.2  |
| 1e | 26 | -36.0797 | 3.5930  | 8.9060  | 0.00847 | 0.2  |
| 1e | 27 | -35.4806 | 5.0520  | 10.9350 | 0.00666 | 0.2  |
| 1e | 28 | -35.2685 | 17.0300 | 19.4210 | 0.00612 | 0.2  |
| 1e | 29 | -35.0730 | 15.9490 | 18.2110 | 0.00566 | 0.2  |
| 1e | 30 | -34.8691 | 15.9640 | 18.0240 | 0.00521 | 0.1  |
| 1f | 1  | -36.1795 | 0.0000  | 0.0000  | 1.00000 | 11.9 |
| 1f | 2  | -36.0090 | 0.1410  | 4.0170  | 0.93391 | 11.1 |
| 1f | 3  | -35.1395 | 1.2280  | 1.4420  | 0.65906 | 7.9  |
| 1f | 4  | -35.1062 | 2.6370  | 4.9130  | 0.65032 | 7.8  |
| 1f | 5  | -35.0688 | 2.0670  | 3.2950  | 0.64063 | 7.6  |
| 1f | 6  | -34.7776 | 1.9900  | 4.5700  | 0.57004 | 6.8  |
| 1f | 7  | -34.7485 | 2.6380  | 6.2340  | 0.56343 | 6.7  |
| 1f | 8  | -34.3283 | 2.5270  | 4.7460  | 0.47608 | 5.7  |
| 1f | 9  | -33.4838 | 2.5020  | 5.5960  | 0.33935 | 4.1  |
| 1f | 10 | -33.4589 | 2.4500  | 4.7200  | 0.33597 | 4.0  |
| 1f | 11 | -32.6560 | 2.3810  | 5.5840  | 0.24351 | 2.9  |
| 1f | 12 | -32.2442 | 2.3510  | 4.8370  | 0.20645 | 2.5  |
| 1f | 13 | -32.0029 | 4.0280  | 6.1590  | 0.18741 | 2.2  |
| 1f | 14 | -31.6909 | 4.0200  | 6.5450  | 0.16538 | 2.0  |
| 1f | 15 | -31.4413 | 9.5820  | 11.7400 | 0.14963 | 1.8  |
| 1f | 16 | -31.3664 | 9.6170  | 11.4630 | 0.14520 | 1.7  |
| 1f | 17 | -31.0502 | 10.4980 | 12.1990 | 0.12792 | 1.5  |
| 1f | 18 | -30.9462 | 3.3550  | 5.7760  | 0.12269 | 1.5  |
| 1f | 19 | -30.7507 | 3.4530  | 7.0670  | 0.11344 | 1.4  |
| 1f | 20 | -30.4637 | 3.8430  | 5.8110  | 0.10111 | 1.2  |
| 1f | 21 | -30.3472 | 3.3800  | 6.2360  | 0.09650 | 1.2  |
| 1f | 22 | -30.2224 | 10.3170 | 11.7910 | 0.09179 | 1.1  |
| 1f | 23 | -29.4819 | 4.5070  | 7.4340  | 0.06821 | 0.8  |
| 1f | 24 | -29.3571 | 31.0210 | 33.3740 | 0.06488 | 0.8  |
| 1f | 25 | -29.2989 | 14.2680 | 17.1220 | 0.06339 | 0.8  |
| 1f | 26 | -28.9286 | 11.5600 | 12.6020 | 0.05464 | 0.7  |
| 1f | 27 | -28.9078 | 10.6770 | 11.5570 | 0.05419 | 0.6  |
| 1f | 28 | -28.8954 | 11.2180 | 12.1350 | 0.05392 | 0.6  |
| 1f | 29 | -28.7331 | 7.7230  | 10.0770 | 0.05052 | 0.6  |
| 1f | 30 | -28.6250 | 10.7000 | 11.9370 | 0.04838 | 0.6  |
| 1g | 1  | -35.2643 | 0.0000  | 0.0000  | 1.00000 | 11.0 |
| 1g | 2  | -35.2602 | 2.5400  | 5.8630  | 0.99833 | 10.9 |
| 1g | 3  | -35.2061 | 0.1870  | 4.0100  | 0.97692 | 10.7 |
| 1g | 4  | -35.0896 | 2.4840  | 4.7630  | 0.93235 | 10.2 |
| 1g | 5  | -34.8650 | 2.6990  | 6.2290  | 0.85205 | 9.3  |
| 1g | 6  | -34.4032 | 2.4760  | 4.6830  | 0.70806 | 7.8  |
| 1g | 7  | -33.0013 | 1.6640  | 2.5150  | 0.40362 | 4.4  |
| 1g | 8  | -32.9930 | 1.7600  | 4.3110  | 0.40228 | 4.4  |
| 1g | 9  | -32.6893 | 1.7240  | 4.2830  | 0.35617 | 3.9  |

|    |    |          |         |         |         |      |
|----|----|----------|---------|---------|---------|------|
| 1g | 10 | -32.0445 | 2.7600  | 6.0030  | 0.27503 | 3.0  |
| 1g | 11 | -31.8032 | 3.7820  | 6.8990  | 0.24968 | 2.7  |
| 1g | 12 | -31.1917 | 8.7010  | 10.6100 | 0.19539 | 2.1  |
| 1g | 13 | -31.1792 | 3.7700  | 6.3130  | 0.19442 | 2.1  |
| 1g | 14 | -31.1085 | 9.0050  | 11.1430 | 0.18898 | 2.1  |
| 1g | 15 | -30.8131 | 2.3050  | 3.2420  | 0.16788 | 1.8  |
| 1g | 16 | -30.3805 | 2.1070  | 4.8630  | 0.14114 | 1.5  |
| 1g | 17 | -30.2723 | 9.6210  | 11.5260 | 0.13516 | 1.5  |
| 1g | 18 | -30.1142 | 3.2200  | 6.1030  | 0.12686 | 1.4  |
| 1g | 19 | -29.7149 | 9.5240  | 11.4270 | 0.10809 | 1.2  |
| 1g | 20 | -29.5443 | 3.7960  | 6.2650  | 0.10094 | 1.1  |
| 1g | 21 | -28.8538 | 3.5460  | 5.9180  | 0.07653 | 0.8  |
| 1g | 22 | -28.8205 | 3.6430  | 6.2970  | 0.07552 | 0.8  |
| 1g | 23 | -28.8080 | 10.3470 | 10.9900 | 0.07514 | 0.8  |
| 1g | 24 | -28.3296 | 10.2790 | 11.1590 | 0.06203 | 0.7  |
| 1g | 25 | -28.2214 | 3.8180  | 5.5930  | 0.05939 | 0.7  |
| 1g | 26 | -28.0842 | 3.6420  | 6.3640  | 0.05621 | 0.6  |
| 1g | 27 | -28.0634 | 3.1160  | 5.5490  | 0.05575 | 0.6  |
| 1g | 28 | -27.9594 | 8.2840  | 10.4110 | 0.05347 | 0.6  |
| 1g | 29 | -27.9094 | 7.5710  | 9.8060  | 0.05241 | 0.6  |
| 1g | 30 | -27.8637 | 14.2800 | 17.2650 | 0.05146 | 0.6  |
| 1h | 1  | -47.3699 | 0.0000  | 0.0000  | 1.00000 | 29.2 |
| 1h | 2  | -47.2493 | 0.1450  | 3.6250  | 0.95279 | 27.8 |
| 1h | 3  | -45.1485 | 1.4940  | 4.1830  | 0.41041 | 12.0 |
| 1h | 4  | -44.7907 | 1.4930  | 2.1290  | 0.35557 | 10.4 |
| 1h | 5  | -40.7680 | 2.5020  | 7.5770  | 0.07088 | 2.1  |
| 1h | 6  | -40.6432 | 4.5450  | 7.2070  | 0.06742 | 2.0  |
| 1h | 7  | -40.4685 | 2.5120  | 6.8610  | 0.06286 | 1.8  |
| 1h | 8  | -40.4227 | 4.6800  | 7.0670  | 0.06172 | 1.8  |
| 1h | 9  | -39.7530 | 3.9190  | 6.8510  | 0.04718 | 1.4  |
| 1h | 10 | -39.5866 | 2.1050  | 3.3100  | 0.04414 | 1.3  |
| 1h | 11 | -39.1872 | 10.4910 | 12.6630 | 0.03761 | 1.1  |
| 1h | 12 | -38.7878 | 3.1290  | 6.1350  | 0.03204 | 0.9  |
| 1h | 13 | -38.7338 | 10.5900 | 12.8740 | 0.03136 | 0.9  |
| 1h | 14 | -38.5923 | 2.6330  | 6.8790  | 0.02963 | 0.9  |
| 1h | 15 | -38.5258 | 5.5570  | 10.2400 | 0.02885 | 0.8  |
| 1h | 16 | -38.4925 | 5.3940  | 10.5410 | 0.02847 | 0.8  |
| 1h | 17 | -37.8851 | 3.4360  | 6.0290  | 0.02231 | 0.7  |
| 1h | 18 | -37.7270 | 3.2240  | 5.4220  | 0.02094 | 0.6  |
| 1h | 19 | -37.4442 | 3.4280  | 5.4500  | 0.01870 | 0.5  |
| 1h | 20 | -37.3443 | 2.9900  | 8.3850  | 0.01796 | 0.5  |
| 1h | 21 | -36.2586 | 2.1680  | 6.7730  | 0.01162 | 0.3  |
| 1h | 22 | -36.1920 | 11.4080 | 13.5280 | 0.01132 | 0.3  |
| 1h | 23 | -35.9590 | 2.5970  | 6.7480  | 0.01031 | 0.3  |
| 1h | 24 | -35.9466 | 4.4160  | 7.9120  | 0.01026 | 0.3  |
| 1h | 25 | -35.7094 | 11.3290 | 13.8260 | 0.00933 | 0.3  |
| 1h | 26 | -35.6637 | 2.5640  | 7.2770  | 0.00916 | 0.3  |
| 1h | 27 | -35.2019 | 4.0940  | 8.7720  | 0.00761 | 0.2  |
| 1h | 28 | -35.1645 | 13.6030 | 16.0810 | 0.00750 | 0.2  |
| 1h | 29 | -34.7984 | 15.5180 | 17.7540 | 0.00647 | 0.2  |



|           |    |          |         |         |         |      |
|-----------|----|----------|---------|---------|---------|------|
| <b>1h</b> | 30 | -34.4573 | 13.5180 | 15.6550 | 0.00565 | 0.2  |
| <b>1i</b> | 1  | -40.6890 | 0.0000  | 0.0000  | 1.00000 | 22.9 |
| <b>1i</b> | 2  | -40.4934 | 0.0900  | 3.7660  | 0.92461 | 21.2 |
| <b>1i</b> | 3  | -38.1888 | 3.1060  | 6.0950  | 0.36702 | 8.4  |
| <b>1i</b> | 4  | -37.9184 | 3.1070  | 7.0530  | 0.32932 | 7.6  |
| <b>1i</b> | 5  | -36.0256 | 3.6350  | 6.1470  | 0.15419 | 3.5  |
| <b>1i</b> | 6  | -35.8675 | 3.6890  | 5.5630  | 0.14472 | 3.3  |
| <b>1i</b> | 7  | -35.6470 | 3.0730  | 5.7630  | 0.13248 | 3.0  |
| <b>1i</b> | 8  | -35.5222 | 3.0600  | 6.5810  | 0.12601 | 2.9  |
| <b>1i</b> | 9  | -35.2477 | 9.6060  | 11.4040 | 0.11288 | 2.6  |
| <b>1i</b> | 10 | -35.1645 | 9.4920  | 11.6330 | 0.10917 | 2.5  |
| <b>1i</b> | 11 | -34.5322 | 2.8930  | 5.9240  | 0.08473 | 1.9  |
| <b>1i</b> | 12 | -34.5322 | 2.9740  | 4.3450  | 0.08473 | 1.9  |
| <b>1i</b> | 13 | -34.5114 | 2.8760  | 5.1440  | 0.08402 | 1.9  |
| <b>1i</b> | 14 | -34.4989 | 3.6180  | 6.0150  | 0.08361 | 1.9  |
| <b>1i</b> | 15 | -34.4698 | 2.9050  | 6.5100  | 0.08263 | 1.9  |
| <b>1i</b> | 16 | -34.1952 | 3.6190  | 5.6730  | 0.07402 | 1.7  |
| <b>1i</b> | 17 | -33.8582 | 2.0860  | 3.1200  | 0.06467 | 1.5  |
| <b>1i</b> | 18 | -33.8166 | 1.4540  | 1.8650  | 0.06360 | 1.5  |
| <b>1i</b> | 19 | -33.7709 | 2.9830  | 5.1940  | 0.06244 | 1.4  |
| <b>1i</b> | 20 | -32.8141 | 3.2860  | 6.0500  | 0.04255 | 1.0  |
| <b>1i</b> | 21 | -32.0944 | 11.4010 | 12.9300 | 0.03188 | 0.7  |
| <b>1i</b> | 22 | -31.7075 | 10.6150 | 11.8700 | 0.02730 | 0.6  |
| <b>1i</b> | 23 | -31.6451 | 10.4130 | 11.8060 | 0.02663 | 0.6  |
| <b>1i</b> | 24 | -31.4454 | 10.1260 | 11.1470 | 0.02458 | 0.6  |
| <b>1i</b> | 25 | -31.2291 | 3.4270  | 6.5940  | 0.02254 | 0.5  |
| <b>1i</b> | 26 | -31.0586 | 15.1610 | 17.9060 | 0.02105 | 0.5  |
| <b>1i</b> | 27 | -31.0003 | 15.1750 | 17.8700 | 0.02056 | 0.5  |
| <b>1i</b> | 28 | -30.9587 | 7.5430  | 9.6540  | 0.02022 | 0.5  |
| <b>1i</b> | 29 | -30.7965 | 7.5640  | 9.6300  | 0.01895 | 0.4  |
| <b>1i</b> | 30 | -30.7507 | 19.1540 | 21.7440 | 0.01861 | 0.4  |
| <b>2a</b> | 1  | -39.1165 | 0.0000  | 0.0000  | 1.00000 | 26.5 |
| <b>2a</b> | 2  | -37.0614 | 2.2960  | 5.0560  | 0.43873 | 11.6 |
| <b>2a</b> | 3  | -36.2627 | 2.3670  | 4.7200  | 0.31851 | 8.4  |
| <b>2a</b> | 4  | -36.1587 | 2.2500  | 4.6890  | 0.30550 | 8.1  |
| <b>2a</b> | 5  | -35.8675 | 2.9040  | 6.2660  | 0.27184 | 7.2  |
| <b>2a</b> | 6  | -35.3309 | 2.2280  | 5.1720  | 0.21922 | 5.8  |
| <b>2a</b> | 7  | -33.9331 | 3.1400  | 6.2640  | 0.12517 | 3.3  |
| <b>2a</b> | 8  | -33.5546 | 3.4000  | 5.5050  | 0.10755 | 2.8  |
| <b>2a</b> | 9  | -33.0096 | 2.3350  | 3.5100  | 0.08644 | 2.3  |
| <b>2a</b> | 10 | -33.0054 | 3.2000  | 7.2540  | 0.08630 | 2.3  |
| <b>2a</b> | 11 | -32.8016 | 3.0480  | 5.5460  | 0.07952 | 2.1  |
| <b>2a</b> | 12 | -32.6726 | 10.5770 | 12.1920 | 0.07552 | 2.0  |
| <b>2a</b> | 13 | -32.1277 | 9.0450  | 10.9870 | 0.06070 | 1.6  |
| <b>2a</b> | 14 | -31.9571 | 4.4260  | 7.1470  | 0.05669 | 1.5  |
| <b>2a</b> | 15 | -31.9488 | 14.9530 | 17.9250 | 0.05650 | 1.5  |
| <b>2a</b> | 16 | -31.3747 | 15.1630 | 18.0040 | 0.04488 | 1.2  |
| <b>2a</b> | 17 | -31.2749 | 15.2870 | 17.9140 | 0.04312 | 1.1  |
| <b>2a</b> | 18 | -31.2666 | 9.8760  | 11.4360 | 0.04298 | 1.1  |
| <b>2a</b> | 19 | -31.1251 | 20.2450 | 23.1630 | 0.04061 | 1.1  |

|    |    |          |         |         |         |      |
|----|----|----------|---------|---------|---------|------|
| 2a | 20 | -31.1085 | 20.7430 | 23.4350 | 0.04034 | 1.1  |
| 2a | 21 | -30.8131 | 3.6620  | 8.0120  | 0.03583 | 0.9  |
| 2a | 22 | -30.7674 | 15.4180 | 18.4590 | 0.03518 | 0.9  |
| 2a | 23 | -30.5802 | 14.8080 | 17.3880 | 0.03264 | 0.9  |
| 2a | 24 | -30.2890 | 15.9290 | 18.8260 | 0.02904 | 0.8  |
| 2a | 25 | -30.0061 | 3.9490  | 7.4570  | 0.02593 | 0.7  |
| 2a | 26 | -29.9603 | 7.7510  | 10.1140 | 0.02546 | 0.7  |
| 2a | 27 | -29.9437 | 21.1550 | 23.1030 | 0.02529 | 0.7  |
| 2a | 28 | -29.9354 | 19.6070 | 22.3010 | 0.02520 | 0.7  |
| 2a | 29 | -29.8730 | 4.5740  | 7.3210  | 0.02458 | 0.7  |
| 2a | 30 | -29.3322 | 3.9960  | 8.3420  | 0.01979 | 0.5  |
| 2b | 1  | -43.7882 | 0.0000  | 0.0000  | 1.00000 | 35.7 |
| 2b | 2  | -41.5584 | 1.2600  | 2.3180  | 0.40905 | 14.6 |
| 2b | 3  | -40.3520 | 2.1000  | 4.3280  | 0.25219 | 9.0  |
| 2b | 4  | -39.5533 | 9.1980  | 12.2660 | 0.18309 | 6.5  |
| 2b | 5  | -37.8810 | 9.2240  | 11.7390 | 0.09365 | 3.3  |
| 2b | 6  | -37.4275 | 4.7790  | 8.9030  | 0.07808 | 2.8  |
| 2b | 7  | -37.3859 | 4.5990  | 9.5040  | 0.07679 | 2.7  |
| 2b | 8  | -37.1446 | 2.0640  | 3.0610  | 0.06971 | 2.5  |
| 2b | 9  | -37.1155 | 2.6920  | 4.3220  | 0.06890 | 2.5  |
| 2b | 10 | -36.9034 | 15.0450 | 17.5780 | 0.06328 | 2.3  |
| 2b | 11 | -36.8202 | 14.8090 | 17.7360 | 0.06121 | 2.2  |
| 2b | 12 | -36.5914 | 5.4650  | 10.9190 | 0.05584 | 2.0  |
| 2b | 13 | -35.8634 | 15.0030 | 17.4840 | 0.04171 | 1.5  |
| 2b | 14 | -35.7885 | 5.1390  | 8.2900  | 0.04047 | 1.4  |
| 2b | 15 | -35.5638 | 21.5270 | 23.8260 | 0.03699 | 1.3  |
| 2b | 16 | -35.1686 | 5.5240  | 10.7710 | 0.03157 | 1.1  |
| 2b | 17 | -34.8941 | 5.4650  | 7.9060  | 0.02828 | 1.0  |
| 2b | 18 | -34.7901 | 2.7150  | 5.9040  | 0.02712 | 1.0  |
| 2b | 19 | -34.5322 | 5.4560  | 10.3100 | 0.02446 | 0.9  |
| 2b | 20 | -33.8915 | 6.9240  | 11.3820 | 0.01892 | 0.7  |
| 2b | 21 | -33.8749 | 9.9840  | 12.0710 | 0.01879 | 0.7  |
| 2b | 22 | -33.6627 | 4.1920  | 7.5820  | 0.01726 | 0.6  |
| 2b | 23 | -33.6336 | 15.6730 | 18.1190 | 0.01706 | 0.6  |
| 2b | 24 | -33.4339 | 5.3940  | 9.9010  | 0.01575 | 0.6  |
| 2b | 25 | -33.3466 | 5.6820  | 9.9610  | 0.01521 | 0.5  |
| 2b | 26 | -32.8598 | 9.3150  | 11.9400 | 0.01251 | 0.4  |
| 2b | 27 | -32.8474 | 4.2020  | 7.8520  | 0.01245 | 0.4  |
| 2b | 28 | -32.7350 | 15.2230 | 17.4690 | 0.01190 | 0.4  |
| 2b | 29 | -32.6976 | 10.0550 | 12.0920 | 0.01172 | 0.4  |
| 2b | 30 | -32.2941 | 3.3380  | 7.7040  | 0.00997 | 0.4  |
| 2c | 1  | -41.3920 | 0.0000  | 0.0000  | 1.00000 | 20.3 |
| 2c | 2  | -41.3587 | 0.0340  | 3.1260  | 0.98675 | 20.0 |
| 2c | 3  | -39.3661 | 2.0660  | 5.2550  | 0.44388 | 9.0  |
| 2c | 4  | -39.3078 | 2.0590  | 4.2220  | 0.43363 | 8.8  |
| 2c | 5  | -37.2736 | 2.5590  | 4.8040  | 0.19184 | 3.9  |
| 2c | 6  | -36.9491 | 3.2520  | 6.5500  | 0.16844 | 3.4  |
| 2c | 7  | -36.6912 | 2.9770  | 5.3400  | 0.15189 | 3.1  |
| 2c | 8  | -35.9133 | 3.3200  | 6.1620  | 0.11120 | 2.3  |
| 2c | 9  | -35.8800 | 3.3130  | 5.9880  | 0.10972 | 2.2  |

|    |    |          |         |         |         |      |
|----|----|----------|---------|---------|---------|------|
| 2c | 10 | -35.5888 | 20.2560 | 24.1470 | 0.09763 | 2.0  |
| 2c | 11 | -35.4557 | 20.2350 | 24.2920 | 0.09256 | 1.9  |
| 2c | 12 | -35.4224 | 3.1560  | 6.7380  | 0.09133 | 1.9  |
| 2c | 13 | -35.2186 | 2.4970  | 4.9470  | 0.08416 | 1.7  |
| 2c | 14 | -35.1728 | 2.5040  | 5.6110  | 0.08263 | 1.7  |
| 2c | 15 | -35.1229 | 20.5280 | 24.5800 | 0.08100 | 1.6  |
| 2c | 16 | -34.8275 | 2.9910  | 6.1870  | 0.07195 | 1.5  |
| 2c | 17 | -34.7734 | 2.4410  | 5.3330  | 0.07041 | 1.4  |
| 2c | 18 | -34.7610 | 3.0210  | 5.5690  | 0.07006 | 1.4  |
| 2c | 19 | -34.4198 | 2.7380  | 4.7500  | 0.06110 | 1.2  |
| 2c | 20 | -34.1411 | 20.6690 | 24.8320 | 0.05464 | 1.1  |
| 2c | 21 | -34.0954 | 20.4900 | 24.3700 | 0.05365 | 1.1  |
| 2c | 22 | -34.0787 | 20.5110 | 24.2040 | 0.05329 | 1.1  |
| 2c | 23 | -33.9789 | 3.7010  | 6.6370  | 0.05120 | 1.0  |
| 2c | 24 | -33.8749 | 27.5440 | 30.6860 | 0.04911 | 1.0  |
| 2c | 25 | -33.8624 | 27.5020 | 30.6750 | 0.04887 | 1.0  |
| 2c | 26 | -33.8499 | 1.9990  | 3.9980  | 0.04862 | 1.0  |
| 2c | 27 | -33.7834 | 20.6690 | 24.8070 | 0.04734 | 1.0  |
| 2c | 28 | -33.7501 | 2.3820  | 4.5300  | 0.04671 | 0.9  |
| 2c | 29 | -33.5670 | 2.7480  | 6.6650  | 0.04341 | 0.9  |
| 2c | 30 | -33.2925 | 20.2700 | 24.1290 | 0.03888 | 0.8  |
| 2d | 1  | -50.6896 | 0.0000  | 0.0000  | 1.00000 | 39.8 |
| 2d | 2  | -50.5190 | 0.0740  | 2.9460  | 0.93391 | 37.2 |
| 2d | 3  | -44.4288 | 1.3650  | 2.6090  | 0.08127 | 3.2  |
| 2d | 4  | -42.6026 | 3.5700  | 7.4270  | 0.03908 | 1.6  |
| 2d | 5  | -42.5942 | 3.5310  | 7.3660  | 0.03895 | 1.5  |
| 2d | 6  | -42.4528 | 3.4870  | 7.0060  | 0.03680 | 1.5  |
| 2d | 7  | -42.4154 | 3.5170  | 7.6460  | 0.03625 | 1.4  |
| 2d | 8  | -42.4154 | 1.8000  | 3.9650  | 0.03625 | 1.4  |
| 2d | 9  | -42.2656 | 3.4820  | 9.4530  | 0.03414 | 1.4  |
| 2d | 10 | -42.2573 | 3.4810  | 9.8530  | 0.03403 | 1.4  |
| 2d | 11 | -42.0659 | 1.8020  | 4.8150  | 0.03151 | 1.3  |
| 2d | 12 | -41.4211 | 3.4950  | 9.3120  | 0.02434 | 1.0  |
| 2d | 13 | -40.2813 | 3.5620  | 8.5550  | 0.01541 | 0.6  |
| 2d | 14 | -40.2522 | 3.5710  | 8.9640  | 0.01523 | 0.6  |
| 2d | 15 | -40.2230 | 17.1270 | 20.1810 | 0.01505 | 0.6  |
| 2d | 16 | -40.2064 | 16.9990 | 20.3000 | 0.01495 | 0.6  |
| 2d | 17 | -40.0608 | 17.0240 | 20.4580 | 0.01411 | 0.6  |
| 2d | 18 | -39.9235 | 17.1930 | 20.2120 | 0.01335 | 0.5  |
| 2d | 19 | -39.8861 | 17.0540 | 20.3040 | 0.01315 | 0.5  |
| 2d | 20 | -39.8112 | 17.0350 | 20.1450 | 0.01276 | 0.5  |
| 2d | 21 | -39.1539 | 17.7800 | 20.8030 | 0.00981 | 0.4  |
| 2d | 22 | -38.9376 | 3.3290  | 9.1140  | 0.00899 | 0.4  |
| 2d | 23 | -38.8253 | 3.7150  | 9.6710  | 0.00860 | 0.3  |
| 2d | 24 | -38.5590 | 4.8120  | 7.9080  | 0.00773 | 0.3  |
| 2d | 25 | -38.4675 | 4.7760  | 7.7890  | 0.00745 | 0.3  |
| 2d | 26 | -38.4218 | 4.2820  | 8.2320  | 0.00731 | 0.3  |
| 2d | 27 | -38.4010 | 17.8270 | 20.9900 | 0.00725 | 0.3  |
| 2d | 28 | -38.2637 | 4.2710  | 8.0980  | 0.00686 | 0.3  |
| 2d | 29 | -37.2861 | 9.0160  | 11.1050 | 0.00464 | 0.2  |

|    |    |          |         |         |         |      |
|----|----|----------|---------|---------|---------|------|
| 2d | 30 | -37.0198 | 9.0870  | 11.3510 | 0.00417 | 0.2  |
| 2e | 1  | -47.0870 | 0.0000  | 0.0000  | 1.00000 | 32.6 |
| 2e | 2  | -46.2966 | 1.8850  | 4.0150  | 0.72842 | 23.7 |
| 2e | 3  | -45.1277 | 1.0180  | 2.4060  | 0.45588 | 14.8 |
| 2e | 4  | -42.5069 | 4.5260  | 10.5440 | 0.15942 | 5.2  |
| 2e | 5  | -41.4710 | 4.0400  | 6.4240  | 0.10524 | 3.4  |
| 2e | 6  | -41.4003 | 4.2900  | 9.7980  | 0.10230 | 3.3  |
| 2e | 7  | -40.8595 | 8.6010  | 11.8710 | 0.08236 | 2.7  |
| 2e | 8  | -40.2397 | 3.3710  | 8.7730  | 0.06424 | 2.1  |
| 2e | 9  | -40.0816 | 1.9660  | 3.7040  | 0.06029 | 2.0  |
| 2e | 10 | -38.9002 | 3.2780  | 8.4060  | 0.03755 | 1.2  |
| 2e | 11 | -38.6922 | 5.8720  | 9.5620  | 0.03454 | 1.1  |
| 2e | 12 | -38.0141 | 8.8090  | 12.4010 | 0.02632 | 0.9  |
| 2e | 13 | -37.8269 | 3.5360  | 6.3400  | 0.02442 | 0.8  |
| 2e | 14 | -37.5565 | 3.2040  | 8.3640  | 0.02191 | 0.7  |
| 2e | 15 | -37.5107 | 5.3980  | 11.5510 | 0.02151 | 0.7  |
| 2e | 16 | -37.2154 | 4.6820  | 7.8750  | 0.01911 | 0.6  |
| 2e | 17 | -37.1654 | 4.0840  | 8.0370  | 0.01873 | 0.6  |
| 2e | 18 | -36.8867 | 2.9980  | 7.8550  | 0.01675 | 0.5  |
| 2e | 19 | -36.2627 | 3.3820  | 8.3510  | 0.01304 | 0.4  |
| 2e | 20 | -36.0214 | 4.0560  | 7.4020  | 0.01184 | 0.4  |
| 2e | 21 | -35.4931 | 5.2770  | 11.6840 | 0.00958 | 0.3  |
| 2e | 22 | -35.1728 | 5.7120  | 9.0650  | 0.00843 | 0.3  |
| 2e | 23 | -35.0272 | 8.2270  | 10.8450 | 0.00795 | 0.3  |
| 2e | 24 | -34.8483 | 7.9200  | 10.7250 | 0.00740 | 0.2  |
| 2e | 25 | -34.4698 | 16.7240 | 19.1090 | 0.00636 | 0.2  |
| 2e | 26 | -34.2451 | 6.0860  | 9.4730  | 0.00581 | 0.2  |
| 2e | 27 | -34.1661 | 18.2920 | 20.7330 | 0.00563 | 0.2  |
| 2e | 28 | -34.0413 | 17.0920 | 19.5340 | 0.00535 | 0.2  |
| 2e | 29 | -33.9123 | 18.4400 | 20.9920 | 0.00508 | 0.2  |
| 2e | 30 | -33.8208 | 16.3460 | 19.1210 | 0.00490 | 0.2  |
| 2f | 1  | -36.2253 | 0.0000  | 0.0000  | 1.00000 | 17.8 |
| 2f | 2  | -35.2851 | 2.6050  | 4.7620  | 0.68597 | 12.2 |
| 2f | 3  | -34.2077 | 2.4000  | 4.8090  | 0.44536 | 7.9  |
| 2f | 4  | -34.0621 | 3.1780  | 6.2480  | 0.42011 | 7.5  |
| 2f | 5  | -33.4755 | 2.4720  | 4.5620  | 0.33207 | 5.9  |
| 2f | 6  | -33.2592 | 2.5510  | 4.8570  | 0.30449 | 5.4  |
| 2f | 7  | -32.6602 | 3.6450  | 7.0430  | 0.23948 | 4.3  |
| 2f | 8  | -32.3523 | 3.8710  | 5.7220  | 0.21168 | 3.8  |
| 2f | 9  | -31.7158 | 3.2960  | 6.5810  | 0.16400 | 2.9  |
| 2f | 10 | -31.3997 | 3.3370  | 6.2130  | 0.14448 | 2.6  |
| 2f | 11 | -31.3290 | 11.0170 | 12.2130 | 0.14044 | 2.5  |
| 2f | 12 | -31.1875 | 3.5450  | 5.4550  | 0.13270 | 2.4  |
| 2f | 13 | -31.0710 | 4.5820  | 7.1200  | 0.12664 | 2.3  |
| 2f | 14 | -31.0710 | 9.2300  | 10.9760 | 0.12664 | 2.3  |
| 2f | 15 | -30.6758 | 3.2060  | 5.4970  | 0.10809 | 1.9  |
| 2f | 16 | -30.4429 | 8.5910  | 10.8250 | 0.09845 | 1.8  |
| 2f | 17 | -30.3805 | 3.6430  | 6.1850  | 0.09602 | 1.7  |
| 2f | 18 | -30.3264 | 2.4990  | 3.7260  | 0.09396 | 1.7  |
| 2f | 19 | -30.2682 | 8.8910  | 10.7760 | 0.09179 | 1.6  |

|    |    |          |         |         |         |      |
|----|----|----------|---------|---------|---------|------|
| 2f | 20 | -29.9520 | 4.4270  | 7.2860  | 0.08086 | 1.4  |
| 2f | 21 | -29.9478 | 15.1600 | 17.8040 | 0.08073 | 1.4  |
| 2f | 22 | -29.3363 | 7.5540  | 9.8040  | 0.06318 | 1.1  |
| 2f | 23 | -29.2157 | 10.6140 | 11.4080 | 0.06019 | 1.1  |
| 2f | 24 | -29.1574 | 15.2520 | 17.9340 | 0.05880 | 1.0  |
| 2f | 25 | -29.0160 | 4.7210  | 7.4000  | 0.05556 | 1.0  |
| 2f | 26 | -28.9994 | 4.4980  | 8.1700  | 0.05519 | 1.0  |
| 2f | 27 | -28.9453 | 15.0080 | 17.3710 | 0.05401 | 1.0  |
| 2f | 28 | -28.9120 | 4.6970  | 7.5400  | 0.05329 | 0.9  |
| 2f | 29 | -28.6582 | 15.4160 | 18.0960 | 0.04814 | 0.9  |
| 2f | 30 | -28.5459 | 8.1750  | 10.2220 | 0.04602 | 0.8  |
| 3a | 1  | -45.9056 | 0.0000  | 0.0000  | 1.00000 | 24.8 |
| 3a | 2  | -44.6493 | 4.0850  | 6.8960  | 0.60431 | 15.0 |
| 3a | 3  | -43.9088 | 2.7430  | 6.7610  | 0.44909 | 11.1 |
| 3a | 4  | -43.6051 | 2.7330  | 7.3840  | 0.39761 | 9.9  |
| 3a | 5  | -43.4096 | 1.9650  | 6.9800  | 0.36763 | 9.1  |
| 3a | 6  | -43.1434 | 2.8490  | 8.0340  | 0.33042 | 8.2  |
| 3a | 7  | -41.9411 | 1.5640  | 2.1600  | 0.20405 | 5.1  |
| 3a | 8  | -40.2979 | 2.8040  | 4.9850  | 0.10559 | 2.6  |
| 3a | 9  | -39.8237 | 3.6120  | 9.5470  | 0.08731 | 2.2  |
| 3a | 10 | -39.6282 | 2.0360  | 4.7680  | 0.08073 | 2.0  |
| 3a | 11 | -39.5242 | 4.1940  | 8.6540  | 0.07743 | 1.9  |
| 3a | 12 | -37.6397 | 5.2790  | 9.4100  | 0.03638 | 0.9  |
| 3a | 13 | -36.9990 | 7.6660  | 12.0840 | 0.02814 | 0.7  |
| 3a | 14 | -36.9616 | 3.5170  | 8.3350  | 0.02772 | 0.7  |
| 3a | 15 | -36.2378 | 3.4760  | 5.4440  | 0.02074 | 0.5  |
| 3a | 16 | -36.1504 | 6.5350  | 9.5560  | 0.02002 | 0.5  |
| 3a | 17 | -36.0922 | 17.4050 | 22.5570 | 0.01956 | 0.5  |
| 3a | 18 | -36.0006 | 3.1170  | 8.7290  | 0.01886 | 0.5  |
| 3a | 19 | -35.8467 | 3.4760  | 8.1980  | 0.01773 | 0.4  |
| 3a | 20 | -35.8093 | 17.9830 | 22.1220 | 0.01746 | 0.4  |
| 3a | 21 | -35.7926 | 5.1480  | 9.6260  | 0.01735 | 0.4  |
| 3a | 22 | -35.7718 | 7.3630  | 10.8010 | 0.01720 | 0.4  |
| 3a | 23 | -35.3434 | 8.6610  | 10.2470 | 0.01449 | 0.4  |
| 3a | 24 | -35.1021 | 18.6380 | 22.9540 | 0.01315 | 0.3  |
| 3a | 25 | -35.0938 | 16.2500 | 21.5730 | 0.01311 | 0.3  |
| 3a | 26 | -34.7485 | 16.6970 | 22.1060 | 0.01141 | 0.3  |
| 3a | 27 | -34.3907 | 16.7820 | 20.8790 | 0.00989 | 0.2  |
| 3a | 28 | -34.3824 | 20.2040 | 23.9720 | 0.00986 | 0.2  |
| 3a | 29 | -33.6170 | 22.8680 | 25.7980 | 0.00725 | 0.2  |
| 3a | 30 | -33.5296 | 16.3960 | 21.5950 | 0.00700 | 0.2  |
| 3b | 1  | -50.1488 | 0.0000  | 0.0000  | 1.00000 | 43.9 |
| 3b | 2  | -46.6253 | 2.9100  | 8.4050  | 0.24351 | 10.7 |
| 3b | 3  | -46.4755 | 3.8880  | 10.0030 | 0.22932 | 10.1 |
| 3b | 4  | -45.3690 | 2.0790  | 7.5250  | 0.14715 | 6.5  |
| 3b | 5  | -44.1834 | 2.7510  | 8.1850  | 0.09148 | 4.0  |
| 3b | 6  | -43.7715 | 2.3540  | 7.6320  | 0.07756 | 3.4  |
| 3b | 7  | -43.7674 | 4.8700  | 11.0130 | 0.07743 | 3.4  |
| 3b | 8  | -43.6134 | 4.6030  | 9.5180  | 0.07280 | 3.2  |
| 3b | 9  | -43.2640 | 4.8150  | 10.7340 | 0.06328 | 2.8  |

|           |    |          |         |         |         |      |
|-----------|----|----------|---------|---------|---------|------|
| <b>3b</b> | 10 | -43.1725 | 3.9220  | 10.2150 | 0.06100 | 2.7  |
| <b>3b</b> | 11 | -42.0202 | 3.8200  | 7.6530  | 0.03843 | 1.7  |
| <b>3b</b> | 12 | -41.3005 | 7.3210  | 10.3130 | 0.02880 | 1.3  |
| <b>3b</b> | 13 | -40.2438 | 2.9230  | 8.4780  | 0.01886 | 0.8  |
| <b>3b</b> | 14 | -40.1690 | 15.3980 | 19.3660 | 0.01830 | 0.8  |
| <b>3b</b> | 15 | -39.4826 | 5.2410  | 10.1330 | 0.01390 | 0.6  |
| <b>3b</b> | 16 | -39.2579 | 5.3900  | 9.3550  | 0.01270 | 0.6  |
| <b>3b</b> | 17 | -38.5590 | 3.6740  | 7.7630  | 0.00960 | 0.4  |
| <b>3b</b> | 18 | -38.1722 | 5.1170  | 10.8420 | 0.00822 | 0.4  |
| <b>3b</b> | 19 | -38.0723 | 16.7250 | 21.6080 | 0.00789 | 0.3  |
| <b>3b</b> | 20 | -37.8269 | 16.8240 | 20.7090 | 0.00715 | 0.3  |
| <b>3b</b> | 21 | -37.5606 | 20.7230 | 24.6940 | 0.00643 | 0.3  |
| <b>3b</b> | 22 | -37.5315 | 16.6080 | 21.0070 | 0.00636 | 0.3  |
| <b>3b</b> | 23 | -37.5190 | 16.5880 | 20.4430 | 0.00632 | 0.3  |
| <b>3b</b> | 24 | -37.1114 | 4.9980  | 8.9900  | 0.00537 | 0.2  |
| <b>3b</b> | 25 | -36.9699 | 5.1150  | 9.4080  | 0.00507 | 0.2  |
| <b>3b</b> | 26 | -36.7453 | 20.1440 | 24.1460 | 0.00464 | 0.2  |
| <b>3b</b> | 27 | -36.3917 | 19.9060 | 22.8060 | 0.00402 | 0.2  |
| <b>3b</b> | 28 | -36.3501 | 4.4760  | 8.9130  | 0.00396 | 0.2  |
| <b>3b</b> | 29 | -36.1754 | 17.2330 | 21.8610 | 0.00369 | 0.2  |
| <b>3b</b> | 30 | -35.7136 | 16.0480 | 19.9300 | 0.00307 | 0.1  |
| <b>3c</b> | 1  | -40.1107 | 0.0000  | 0.0000  | 1.00000 | 14.5 |
| <b>3c</b> | 2  | -40.0733 | 0.1280  | 5.6160  | 0.98510 | 14.3 |
| <b>3c</b> | 3  | -40.0733 | 0.1030  | 3.0390  | 0.98510 | 14.3 |
| <b>3c</b> | 4  | -40.0608 | 0.1000  | 4.7240  | 0.98019 | 14.2 |
| <b>3c</b> | 5  | -36.6621 | 2.6180  | 5.1190  | 0.25093 | 3.6  |
| <b>3c</b> | 6  | -36.5581 | 2.5910  | 5.3520  | 0.24068 | 3.5  |
| <b>3c</b> | 7  | -36.3917 | 2.6040  | 4.7530  | 0.22515 | 3.3  |
| <b>3c</b> | 8  | -36.1754 | 2.6300  | 5.5810  | 0.20645 | 3.0  |
| <b>3c</b> | 9  | -35.4806 | 2.9530  | 6.0280  | 0.15626 | 2.3  |
| <b>3c</b> | 10 | -35.4765 | 2.9310  | 6.2020  | 0.15600 | 2.3  |
| <b>3c</b> | 11 | -35.3766 | 2.9740  | 5.2040  | 0.14988 | 2.2  |
| <b>3c</b> | 12 | -35.1312 | 20.8810 | 24.5750 | 0.13583 | 2.0  |
| <b>3c</b> | 13 | -35.0813 | 20.8910 | 24.7470 | 0.13314 | 1.9  |
| <b>3c</b> | 14 | -35.0563 | 20.8610 | 24.9710 | 0.13182 | 1.9  |
| <b>3c</b> | 15 | -35.0230 | 2.6420  | 5.6540  | 0.13007 | 1.9  |
| <b>3c</b> | 16 | -35.0022 | 2.6520  | 5.0540  | 0.12899 | 1.9  |
| <b>3c</b> | 17 | -34.9773 | 2.6370  | 4.9040  | 0.12770 | 1.9  |
| <b>3c</b> | 18 | -34.9648 | 20.8700 | 24.8080 | 0.12707 | 1.8  |
| <b>3c</b> | 19 | -33.2426 | 2.8840  | 6.7080  | 0.06370 | 0.9  |
| <b>3c</b> | 20 | -33.1011 | 2.8760  | 7.0720  | 0.06019 | 0.9  |
| <b>3c</b> | 21 | -33.0678 | 2.8840  | 5.9730  | 0.05939 | 0.9  |
| <b>3c</b> | 22 | -32.9430 | 2.8820  | 6.3330  | 0.05650 | 0.8  |
| <b>3c</b> | 23 | -32.8598 | 2.8430  | 7.0550  | 0.05464 | 0.8  |
| <b>3c</b> | 24 | -32.8307 | 2.8270  | 6.3650  | 0.05401 | 0.8  |
| <b>3c</b> | 25 | -32.8141 | 2.8390  | 6.0060  | 0.05365 | 0.8  |
| <b>3c</b> | 26 | -32.7974 | 2.8450  | 7.3650  | 0.05329 | 0.8  |
| <b>3c</b> | 27 | -32.4979 | 3.1650  | 6.0490  | 0.04726 | 0.7  |
| <b>3c</b> | 28 | -32.3773 | 24.7720 | 29.0930 | 0.04503 | 0.7  |
| <b>3c</b> | 29 | -32.2525 | 3.0770  | 6.0690  | 0.04283 | 0.6  |

|    |    |          |         |         |         |      |
|----|----|----------|---------|---------|---------|------|
| 3c | 30 | -32.1568 | 2.7740  | 5.7320  | 0.04122 | 0.6  |
| 3d | 1  | -46.8374 | 0.0000  | 0.0000  | 1.00000 | 32.0 |
| 3d | 2  | -43.4262 | 3.5970  | 7.2290  | 0.25472 | 8.1  |
| 3d | 3  | -43.2016 | 3.4150  | 7.2990  | 0.23279 | 7.4  |
| 3d | 4  | -43.1974 | 3.8480  | 9.9140  | 0.23240 | 7.4  |
| 3d | 5  | -42.5485 | 3.8250  | 10.0230 | 0.17916 | 5.7  |
| 3d | 6  | -42.2906 | 3.8200  | 7.5940  | 0.16156 | 5.2  |
| 3d | 7  | -41.7581 | 3.6720  | 10.3500 | 0.13050 | 4.2  |
| 3d | 8  | -40.7181 | 16.7550 | 20.4620 | 0.08601 | 2.8  |
| 3d | 9  | -40.6598 | 3.6160  | 9.7040  | 0.08402 | 2.7  |
| 3d | 10 | -40.5725 | 3.8420  | 9.2390  | 0.08113 | 2.6  |
| 3d | 11 | -40.5600 | 3.7340  | 9.9150  | 0.08073 | 2.6  |
| 3d | 12 | -40.4435 | 16.6470 | 20.1430 | 0.07704 | 2.5  |
| 3d | 13 | -39.8070 | 3.2440  | 5.7410  | 0.05969 | 1.9  |
| 3d | 14 | -39.7405 | 3.9620  | 10.4230 | 0.05812 | 1.9  |
| 3d | 15 | -39.4243 | 3.9050  | 9.0490  | 0.05120 | 1.6  |
| 3d | 16 | -39.2912 | 17.2120 | 20.9230 | 0.04854 | 1.6  |
| 3d | 17 | -38.5382 | 5.0880  | 8.0810  | 0.03589 | 1.1  |
| 3d | 18 | -38.5050 | 3.8040  | 9.4040  | 0.03542 | 1.1  |
| 3d | 19 | -38.3344 | 4.6290  | 8.5520  | 0.03308 | 1.1  |
| 3d | 20 | -37.7894 | 3.5760  | 9.8310  | 0.02658 | 0.9  |
| 3d | 21 | -37.4358 | 5.0770  | 9.0200  | 0.02307 | 0.7  |
| 3d | 22 | -37.1238 | 5.9430  | 8.6730  | 0.02036 | 0.7  |
| 3d | 23 | -37.1238 | 16.6600 | 20.3800 | 0.02036 | 0.7  |
| 3d | 24 | -37.0531 | 16.8350 | 20.4250 | 0.01979 | 0.6  |
| 3d | 25 | -37.0240 | 6.8410  | 10.7430 | 0.01956 | 0.6  |
| 3d | 26 | -36.9658 | 8.4480  | 14.0270 | 0.01911 | 0.6  |
| 3d | 27 | -36.8326 | 16.8880 | 20.5940 | 0.01812 | 0.6  |
| 3d | 28 | -36.5040 | 5.2420  | 9.3750  | 0.01588 | 0.5  |
| 3d | 29 | -35.8925 | 5.2230  | 9.3300  | 0.01243 | 0.4  |
| 3d | 30 | -34.8733 | 5.5790  | 8.9200  | 0.00826 | 0.3  |
| 4c | 1  | -42.9270 | 0.0000  | 0.0000  | 1.00000 | 19.3 |
| 4c | 2  | -42.8480 | 0.0540  | 4.2070  | 0.96881 | 18.7 |
| 4c | 3  | -42.7814 | 0.0730  | 5.2410  | 0.94330 | 18.3 |
| 4c | 4  | -42.7357 | 0.0760  | 3.1260  | 0.92615 | 17.9 |
| 4c | 5  | -38.3178 | 2.6150  | 5.2710  | 0.15757 | 3.0  |
| 4c | 6  | -38.2845 | 2.6360  | 4.6290  | 0.15548 | 3.0  |
| 4c | 7  | -38.1971 | 2.6360  | 5.1560  | 0.15013 | 2.9  |
| 4c | 8  | -38.1430 | 2.6240  | 4.7350  | 0.14691 | 2.8  |
| 4c | 9  | -35.9424 | 1.6680  | 5.4730  | 0.06080 | 1.2  |
| 4c | 10 | -35.3226 | 2.1190  | 3.8430  | 0.04742 | 0.9  |
| 4c | 11 | -35.2602 | 2.6000  | 5.6200  | 0.04625 | 0.9  |
| 4c | 12 | -35.2560 | 1.9290  | 5.6270  | 0.04617 | 0.9  |
| 4c | 13 | -34.9690 | 21.2340 | 24.6290 | 0.04115 | 0.8  |
| 4c | 14 | -34.9648 | 21.2180 | 24.6300 | 0.04108 | 0.8  |
| 4c | 15 | -34.9606 | 21.2410 | 24.8200 | 0.04102 | 0.8  |
| 4c | 16 | -34.8733 | 21.2140 | 24.4390 | 0.03960 | 0.8  |
| 4c | 17 | -34.6611 | 3.1560  | 7.1610  | 0.03638 | 0.7  |
| 4c | 18 | -34.6112 | 3.1550  | 6.6950  | 0.03565 | 0.7  |
| 4c | 19 | -34.5738 | 3.1430  | 6.4560  | 0.03512 | 0.7  |

|    |    |          |        |        |         |     |
|----|----|----------|--------|--------|---------|-----|
| 4c | 20 | -34.5238 | 3.1680 | 5.9220 | 0.03443 | 0.7 |
| 4c | 21 | -33.9789 | 2.7030 | 4.7130 | 0.02767 | 0.5 |
| 4c | 22 | -33.8416 | 2.6350 | 4.9390 | 0.02619 | 0.5 |
| 4c | 23 | -33.6586 | 2.6840 | 5.4350 | 0.02434 | 0.5 |
| 4c | 24 | -33.3050 | 2.7360 | 5.0120 | 0.02112 | 0.4 |
| 4c | 25 | -33.2883 | 2.7350 | 5.6860 | 0.02098 | 0.4 |
| 4c | 26 | -33.1926 | 2.7290 | 4.9090 | 0.02019 | 0.4 |
| 4c | 27 | -33.1594 | 2.7380 | 5.5820 | 0.01992 | 0.4 |
| 4c | 28 | -32.9638 | 2.8350 | 4.9920 | 0.01842 | 0.4 |
| 4c | 29 | -32.9638 | 2.8610 | 4.7530 | 0.01842 | 0.4 |
| 4c | 30 | -32.8848 | 2.8580 | 5.0570 | 0.01785 | 0.3 |

### 3. Configuration of Autodock Vina used in the docking studies

#### 3.1 For PRLm (protein structure extracted from PDB 2HQX)

```

receptor = 2qhx-prot.pdbqt
ligand = <ligand_name>.pdbqt
center_x = -5.178
center_y = 34.985
center_z = 55.300
size_x = 40.0
size_y = 40.0
size_z = 52.0
cpu = 4
exhaustiveness = 24
out = <ligand_name>-results.pdbqt
num_modes = 30
energy_range = 5

```

#### 3.2 For PRTb (protein structure extracted from PDB 4CM7)

```

receptor = 4cm7-prot.pdbqt
ligand = <ligand_name>.pdbqt
center_x = 8.694
center_y = -5.023
center_z = 10.417
size_x = 40.0
size_y = 54.0
size_z = 48.0
cpu = 4
exhaustiveness = 24
out = <ligand_name>-results.pdbqt
num_modes = 30
energy_range = 5

```



## 4. Python Scripts

### 4.1. Script for finding the 10 closest contacts

```
1 #! /usr/bin/env python3
2
3 # MIT License
4 #
5 #Copyright 2024 Filipe Teixeira
6 #
7 # Permission is hereby granted, free of charge, to any person obtaining a copy
8 # of this software and associated documentation files (the "Software"), to deal
9 # in the Software without restriction, including without limitation the rights
10 # to use, copy, modify, merge, publish, distribute, sublicense, and/or sell
11 # copies of the Software, and to permit persons to whom the Software is
12 # furnished to do so, subject to the following conditions:
13 #
14 # The above copyright notice and this permission notice shall be included in
15 # all copies or substantial portions of the Software.
16 #
17 # THE SOFTWARE IS PROVIDED "AS IS", WITHOUT WARRANTY OF ANY KIND, EXPRESS OR
18 # IMPLIED, INCLUDING BUT NOT LIMITED TO THE WARRANTIES OF MERCHANTABILITY,
19 # FITNESS FOR A PARTICULAR PURPOSE AND NONINFRINGEMENT. IN NO EVENT SHALL THE
20 # AUTHORS OR COPYRIGHT HOLDERS BE LIABLE FOR ANY CLAIM, DAMAGES OR OTHER
21 # LIABILITY, WHETHER IN AN ACTION OF CONTRACT, TORT OR OTHERWISE, ARISING FROM,
22 # OUT OF OR IN CONNECTION WITH THE SOFTWARE OR THE USE OR OTHER DEALINGS IN THE
23 # SOFTWARE.
24
25 __doc__=f"""
26 Usage: {_file_} [-h|--help] -r target.pdbqt [-o output.csv] ligand-file(s).pdbqt
27 """
28
29 import numpy as np
30 import pandas as pd
31
32 def read_ref_pdbqt(fn):
33     data=open(fn,'r').readlines()
34     o=list()
35     for line in data:
36         if line.startswith('ATOM'):
37             a=dict()
38             a['ID']=int(line[8:12])
39             a['name']=line[12:17].strip()
40             a['resname']=line[17:20]
41             a['chain']=line[21:22]
42             a['resID']=int(line[22:26])
43             a['pos']=np.array(list(map(float,[line[30:39],line[39:47],line[47:55]))))
44             a['element']=line[77:80].strip()
45             o.append(a)
46     return o
47
48 def find_top_contacts(geo, ref, n=3):
49     o=list()
50     for i in range(n):
51         o.append({'RefResName':'','RefResID':-1,'RefChain':'','RefAtomName':'',
52                 'LigAtom':'','LigAtomID':-1,'Distance':1.0e10,
53                 'Distance_to_B':0.0, 'Distance_to_C8':0.0, 'Orientation':0.0})
54     cut = 1.0e10
55     for a1 in geo:
56         for a2 in ref:
57             d = np.linalg.norm(a2['pos']-a1['pos'])
58             if d < cut:
59                 for e in o:
60                     if e['Distance'] > d:
61                         e['RefResName']=a2['resname']
62                         e['RefResID']=a2['resID']
63                         e['RefChain']=a2['chain']
64                         e['RefAtomName']=a2['name']
65                         e['LigAtom']=a1['name']
66                         e['LigAtomID']=a1['ID']
67                         e['Distance']=d
68                         e['Distance_to_B']=np.linalg.norm(a2['pos']-geo[8]['pos'])
69                         e['Distance_to_C8']=np.linalg.norm(a2['pos']-geo[0]['pos'])
```

```

70         e['Orientation']=np.sign(e['Distance_to_C8']-e['Distance_to_B'])
71         break
72     cut = max([x['Distance'] for x in o])
73     return o
74
75 def analyse_ligand(fn, ref, temperature=300):
76     R = 8.31446261815324e-3 # kJ/mol
77     RT=R*temperature
78     data=open(fn,'r').readlines()
79     o=list()
80     #Structure and close contacts
81     n_models=1
82     for line in data:
83         if line.startswith('MODEL'):
84             m=dict()
85             m['Ligand']=fn[:-6]
86             m['Mode']=n_models
87             g=list()
88         elif line.startswith('REMARK VINA RESULT:'):
89             m['Affinity_kJmol']=4.16*float(line.split()[-3])
90             m['rmsd_L']=float(line.split()[-2])
91             m['rmsd_U']=float(line.split()[-1])
92         elif line.startswith('ATOM') or line.startswith('HETATM'):
93             a=dict()
94             a['ID']=int(line[8:12])
95             a['name']=line[12:17].strip()
96             a['pos']=np.array(list(map(float,[line[30:39],line[39:47],line[47:55]])))
97             a['element']=line[77:80].strip()
98             g.append(a)
99         elif line.startswith('ENDMDL'):
100             contacts = find_top_contacts(g,ref, n=10)
101             contacts.sort(key=lambda x: x['Distance'])
102             n=1
103             for l in contacts:
104                 for k,v in l.items():
105                     m[f'C{n:d}_{k}']=v
106                     n += 1
107             o.append(m)
108             n_models += 1
109     # Thermodynamics
110     ref_BE = o[0]['Affinity_kJmol']
111     sumZ=0.0
112     for m in o:
113         Z=np.exp(-(m['Affinity_kJmol']-ref_BE)/RT)
114         m['Z']=Z
115         sumZ += Z
116     sumPop = 0.0
117     for m in o:
118         pop = 100.0 * (m['Z']/sumZ)
119         m['%Pop'] = pop
120         sumPop += pop
121         m['%CPop'] = sumPop
122     #o=pd.DataFrame(o)
123     return o
124
125 def driver(ref_fn, ligs_fnl, ofn='output.csv'):
126     ref=read_ref_pdbqt(ref_fn)
127     all_data=list()
128     for lfn in ligs_fnl:
129         all_data += analyse_ligand(lfn, ref)
130     final_data=pd.DataFrame(all_data)
131     final_data.to_csv(ofn,index=False)
132
133 def main(args):
134     opts={}
135     opts['ref_fn']="
136     opts['ligs_fnl']=list()
137     if(len(args)<2):
138         print(__doc__)
139         sys.exit(0)
140     n=1
141     while(n<len(args)):
142         if(args[n]=='--help' or args[n]=='-h'):
143             print(__doc__)

```

```

144     sys.exit(0)
145     elif(args[n]=='-r' or args[n]=='-r'):
146         n += 1
147         opts['ref_fn']=args[n]
148     elif(args[n]=='-o' or args[n]=='-o'):
149         n += 1
150         opts['ofn']=args[n]
151     else:
152         opts['ligs_fn'].append(args[n])
153         n += 1
154     if opts['ref_fn'] and opts['ligs_fn']:
155         driver(**opts)
156     print("Goodbye now.")
157
158 if(__name__=='__main__'):
159     import sys
160     main(sys.argv)
161

```

## 4.2. Script for performing Principal Component Analysis on the affinity data

```

1  #! /usr/bin/env python3
2
3  # MIT License
4  #
5  #Copyright 2024 Filipe Teixeira
6  #
7  # Permission is hereby granted, free of charge, to any person obtaining a copy
8  # of this software and associated documentation files (the "Software"), to deal
9  # in the Software without restriction, including without limitation the rights
10 # to use, copy, modify, merge, publish, distribute, sublicense, and/or sell
11 # copies of the Software, and to permit persons to whom the Software is
12 # furnished to do so, subject to the following conditions:
13 #
14 # The above copyright notice and this permission notice shall be included in
15 # all copies or substantial portions of the Software.
16 #
17 # THE SOFTWARE IS PROVIDED "AS IS", WITHOUT WARRANTY OF ANY KIND, EXPRESS OR
18 # IMPLIED, INCLUDING BUT NOT LIMITED TO THE WARRANTIES OF MERCHANTABILITY,
19 # FITNESS FOR A PARTICULAR PURPOSE AND NONINFRINGEMENT. IN NO EVENT SHALL THE
20 # AUTHORS OR COPYRIGHT HOLDERS BE LIABLE FOR ANY CLAIM, DAMAGES OR OTHER
21 # LIABILITY, WHETHER IN AN ACTION OF CONTRACT, TORT OR OTHERWISE, ARISING FROM,
22 # OUT OF OR IN CONNECTION WITH THE SOFTWARE OR THE USE OR OTHER DEALINGS IN THE
23 # SOFTWARE.
24
25 __doc__=f"""
26 Usage: {__file__} [-h|--help] file.csv [-o basename]
27 """
28
29 import pandas as pd
30 import matplotlib.pyplot as plt
31 import seaborn as sns
32 from sklearn import decomposition
33 from sklearn import preprocessing
34 from sklearn import manifold
35 from sklearn import inspection
36
37 def driver(ifn,ofn):
38     data=pd.read_csv(ifn)
39     # get list of named residues
40     contact_count = 0
41     for c_n in data.columns:
42         if c_n.endswith('_RefResName'):
43             contact_count += 1
44     aa_lst = list()
45     la_lst = list()
46     for n in range(contact_count):
47         l1=f'C{n+1}_RefResName'
48         l2=f'C{n+1}_RefResID'
49         l3=f'C{n+1}_RefChain'
50         l4=f'C{n+1}_LigAtom'

```

```

51 l5=f'C{n+1}_LigAtomID'
52 for l in data.iterrows():
53     s=f"{l[1][1]}{l[1][2]}{l[1][3]}"
54     if s not in aa_lst: aa_lst.append(s)
55     sa=f"{l[1][4]}{l[1][5]}"
56     if sa not in la_lst: la_lst.append(sa)
57 ll = list(set(data['Ligand']))
58 ll.sort()
59 lll=[x.replace('-results','') for x in ll]
60 aa_lst.sort(key=lambda x: int(x[3:-3]))
61 la_lst.sort(key=lambda x: int(x[x.index('(')+1:-1]))
62 # aa affinity per ligand
63 res_aa=list()
64 res_at=list()
65 for lig in ll:
66     o=dict()
67     oa=dict()
68     o['Ligand']=lig
69     oa['Ligand']=lig
70     for aan in aa_lst:
71         o[aan]=0.0
72     for a in la_lst:
73         oa[a]=0.0
74     d=data.loc[data['Ligand']==lig]
75     for n in range(contact_count):
76         l1=f'C{n+1}_RefResName'
77         l2=f'C{n+1}_RefResID'
78         l3=f'C{n+1}_RefChain'
79         l4=f'C{n+1}_LigAtom'
80         l5=f'C{n+1}_LigAtomID'
81         l6=f'C{n+1}_Orientation'
82         l7=f'C{n+1}_Distance'
83         for l in d.iterrows():
84             s=f"{l[1][1]}{l[1][2]}{l[1][3]}"
85             sa=f"{l[1][4]}{l[1][5]}"
86             o[s] += l[1]['%Pop']
87             oa[sa] += l[1]['%Pop']
88         res_aa.append(o)
89         res_at.append(oa)
90 res_aa=pd.DataFrame(res_aa)
91 res_aa.to_csv(ofn+'-aa_affinity.csv',index=False)
92 res_at=pd.DataFrame(res_at)
93 res_at.to_csv(ofn+'-atom_affinity.csv',index=False)
94 # PCA
95 n_comp=10
96 pca = decomposition.PCA(n_components=n_comp)
97 pc_lst=[f"PC{x+1}" for x in range(n_comp)]
98 in_data=preprocessing.StandardScaler(with_std=False).fit_transform(res_aa[aa_lst])
99 #scores=pca.fit_transform(in_data) # works well for 2qhx
100 scores=pca.fit_transform(res_aa[aa_lst])
101 scores=pd.DataFrame(scores, columns=pc_lst)
102 scores['Ligand']=lll
103 scores=scores.reindex(columns=['Ligand']+pc_lst)
104 print(scores)
105 loadings=pd.DataFrame(pca.components_,columns=aa_lst)
106 loadings['PC']=pc_lst
107 loadings['ExpVar']=100.0*pca.explained_variance_ratio_
108 loadings = loadings.reindex(columns=['PC','ExpVar']+aa_lst)
109 scores.to_csv(ofn+'-aa_pca_scores.csv', index=False)
110 loadings.to_csv(ofn+'-aa_pca_loadings.csv', index=False)
111 # plot PCA scores
112 fig_size=(10,8)
113 fig_dpi=96
114 for i in range(n_comp):
115     fig,ax=plt.subplots(figsize=fig_size,dpi=fig_dpi)
116     ax.bar(scores['Ligand'],scores[f"PC{i+1}"])
117     ax.set_xlabel(f"PC{i+1} ({100.0*pca.explained_variance_ratio_[i]:0.1f} %)")
118     ax.set_ylabel(f"Score")
119     fig.savefig(ofn+f'-aa_pca_scores{i+1:02d}.png')
120     plt.clf()
121     plt.close()
122
123 def main(args):
124     opts={}

```

```

125 opts['ifn']="
126 opts['ofn']='output'
127 if(len(args)<2):
128     print(__doc__)
129     sys.exit(0)
130 n=1
131 while(n<len(args)):
132     if(args[n]=='--help' or args[n]=='-h'):
133         print(__doc__)
134         sys.exit(0)
135     elif(args[n]=='--output' or args[n]=='-o'):
136         n += 1
137         opts['ofn']=args[n]
138     else:
139         opts['ifn']=args[n]
140         n += 1
141 if opts['ifn']:
142     driver(opts['ifn'],opts['ofn'])
143 print("Goodbye now.")
144
145 if(__name__=='__main__'):
146     import sys
147     main(sys.argv)
148

```

## 5. References:

1. Cunha Dias De Rezende, L.; Menezes Vaidergorn, M.; Biazotto Moraes, J.C.; Da Silva Emery, F. Synthesis, Photophysical Properties and Solvatochromism of *Meso*-Substituted Tetramethyl BODIPY Dyes. *J. Fluoresc.* **2014**, *24*, 257–266, doi:10.1007/s10895-013-1293-8.
2. Shi, W.-J.; Yan, X.-H.; Yang, J.; Wei, Y.-F.; Huo, Y.-T.; Su, C.-L.; Yan, J.; Han, D.; Niu, L. Development of *Meso* -Five-Membered Heterocycle BODIPY-Based AIE Fluorescent Probes for Dual-Organelle Viscosity Imaging. *Anal. Chem.* **2023**, *95*, 9646–9653, doi:10.1021/acs.analchem.3c01409.
3. Kukoyi, A.; He, H.; Wheeler, K. Quinoline-Functionalized BODIPY Dyes: Structural and Photophysical Properties. *J. Photochem. Photobiol. Chem.* **2022**, *425*, 113686, doi:10.1016/j.jphotochem.2021.113686.
